# Supplementary material for: PTH counteracts Hippo signaling via Src-dependent YAP stabilization to enhance bone marrow stromal cell differentiation
Source: JCI journal article supplement (doi:10.1172/jci.insight.191245), 2025-07-22

**Figure 2**

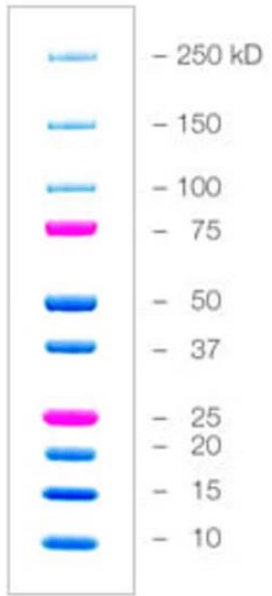

**Figure 2A**

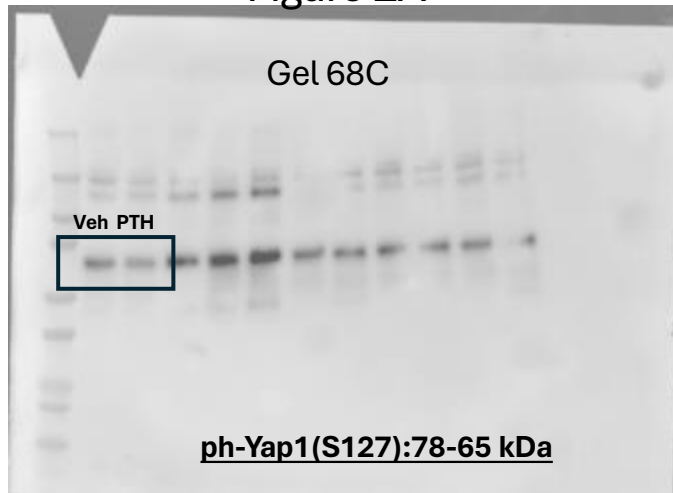

**Figure 2A**

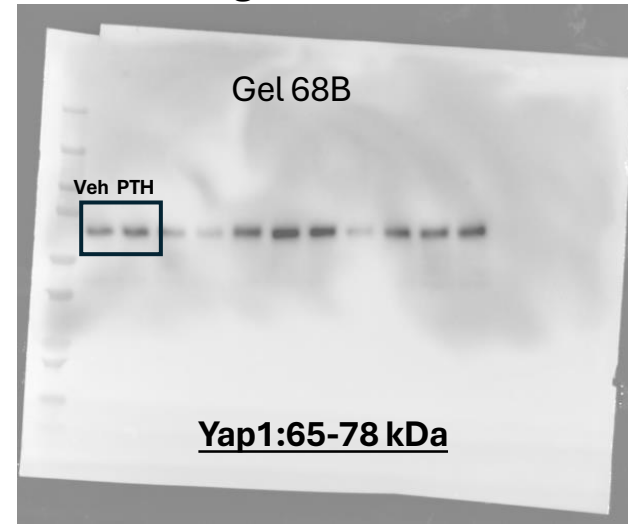

**Gel 68C**

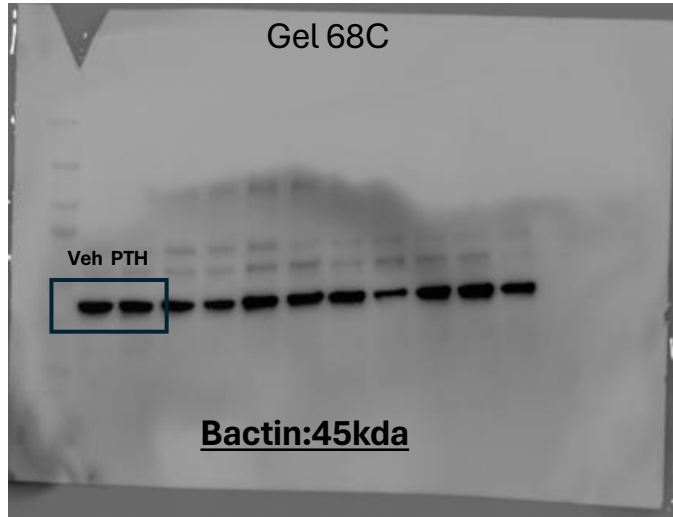

**Gel 68B**

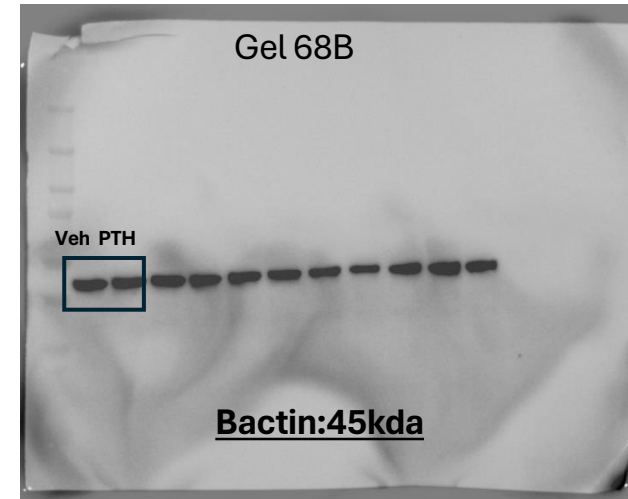

**Figure 2**

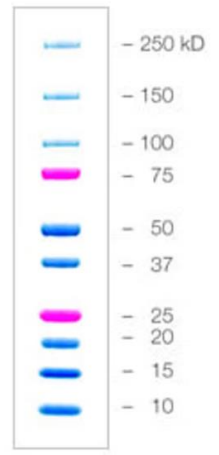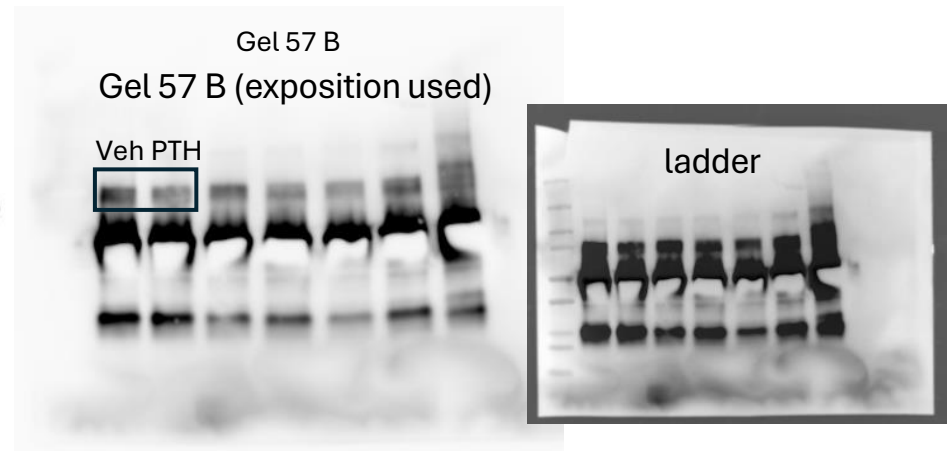

**Figure 2B**

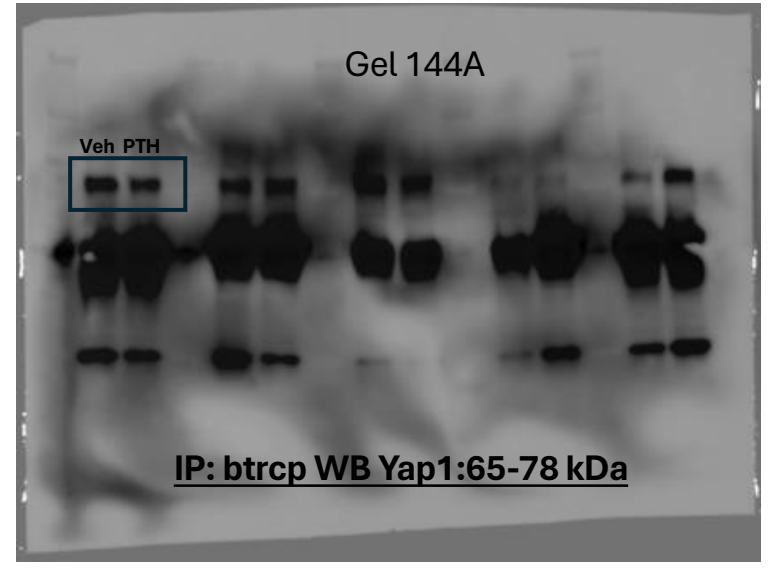

**Figure 2B**

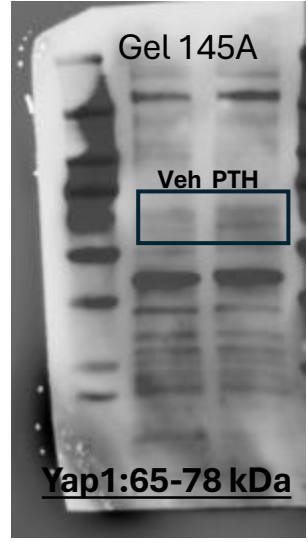

**Figure 2B**

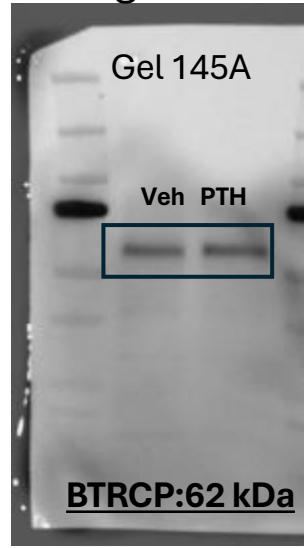

**Figure 2B**

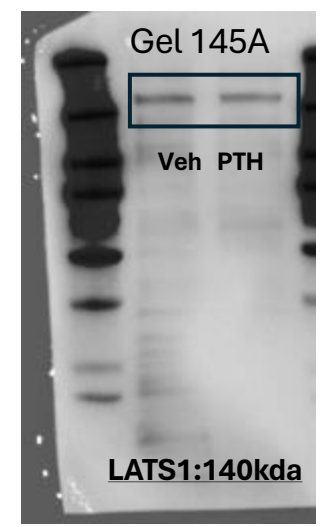

**Figure 2B**

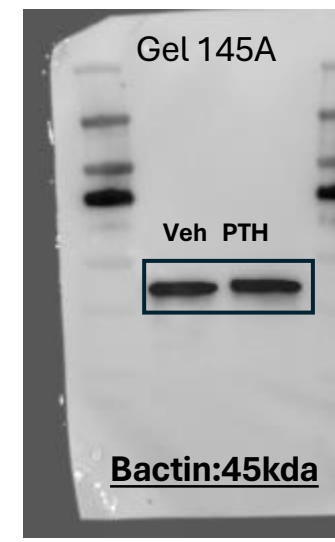

**Figure 2B**

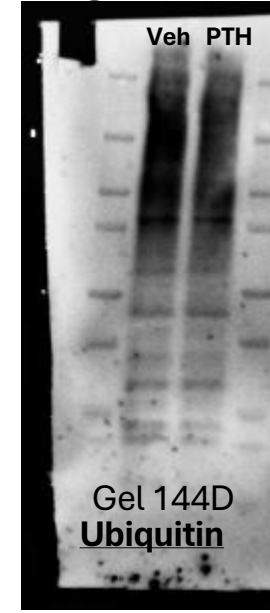

**Figure 2B**

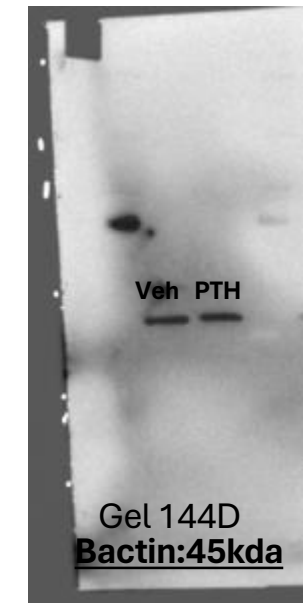

**Figure 2**

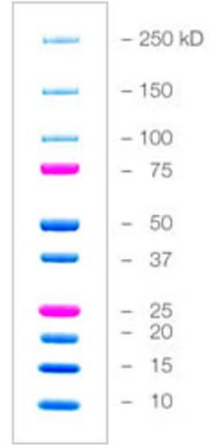

**Figure 2C**

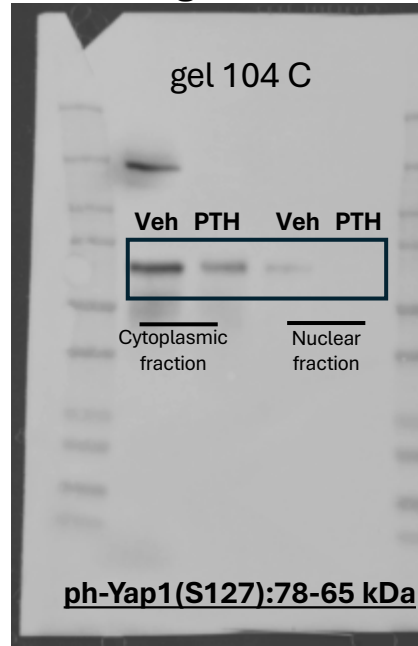

**Figure 2C**

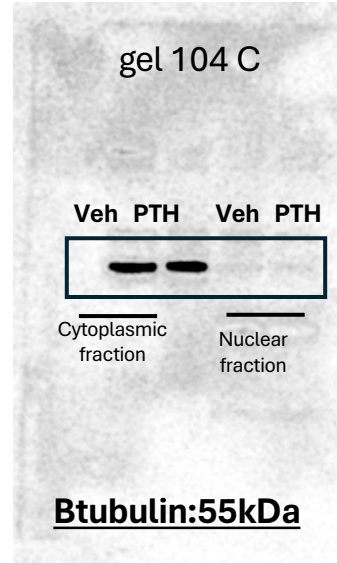

**Figure 2C**

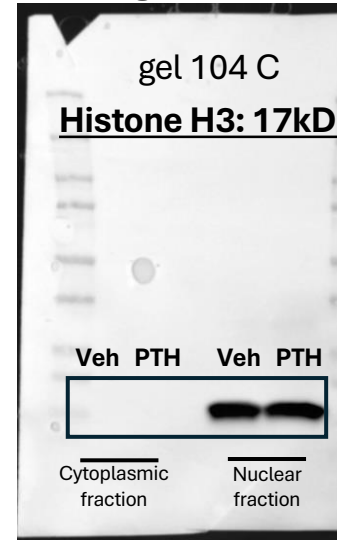

**Figure 2C**

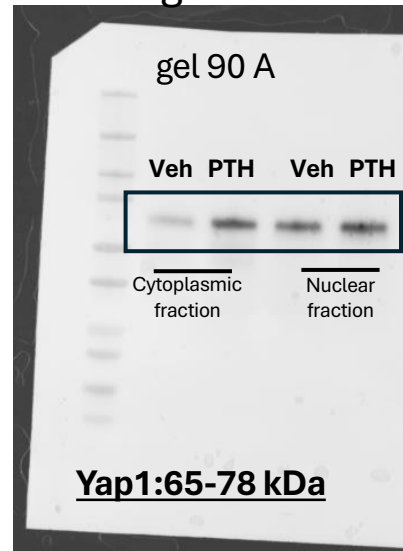

**Figure 2C**

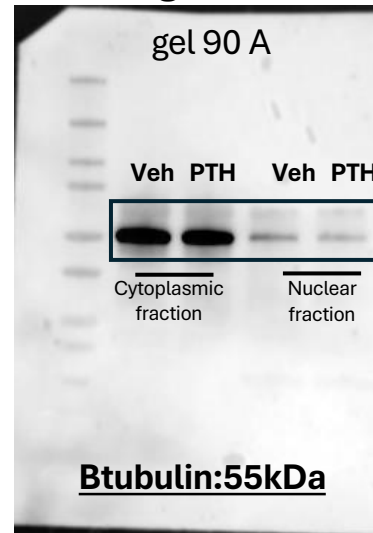

**Figure 2C**

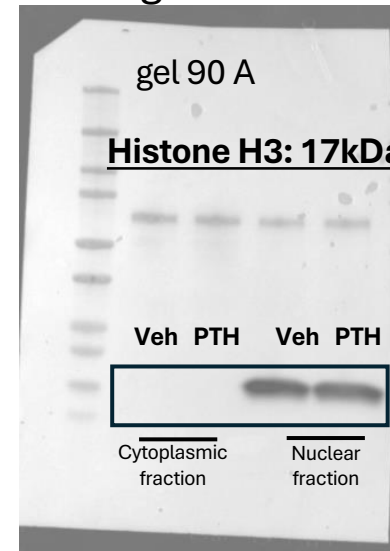

# Figure 2

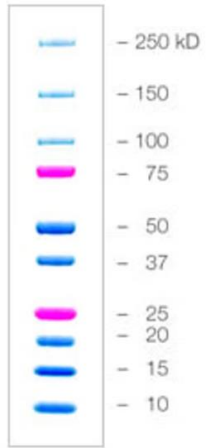

Figure 2D

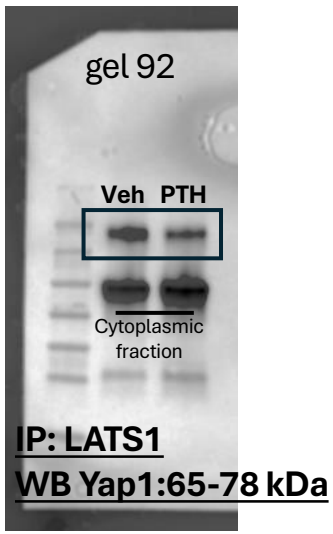

Figure 2D

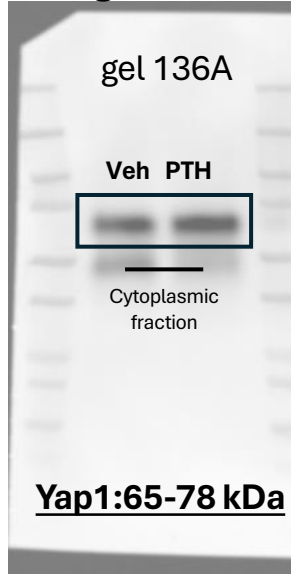

Figure 2D

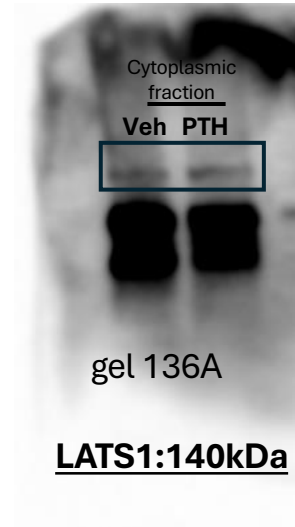

Figure 2D

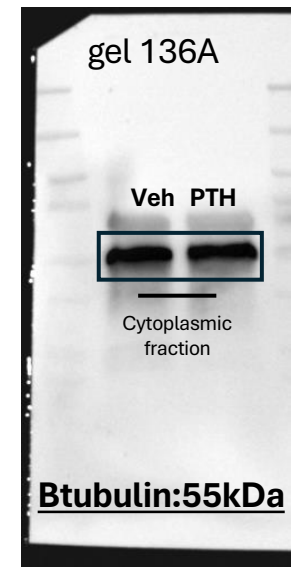

Figure 2D

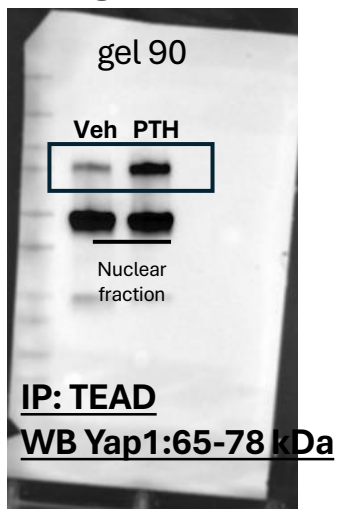

Figure 2D

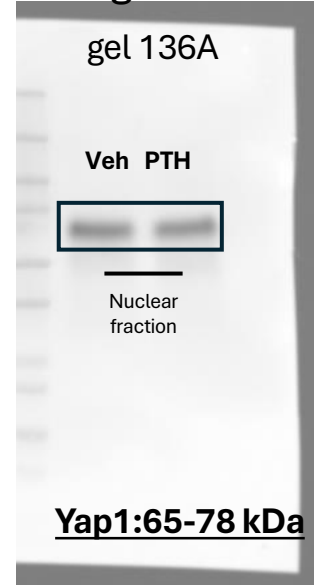

Figure 2D

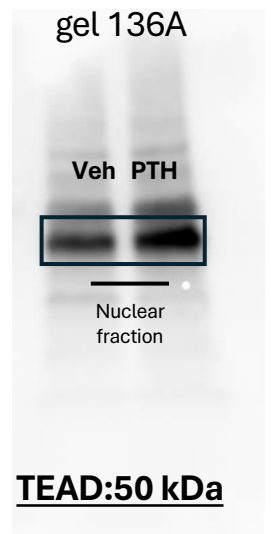

Figure 2D

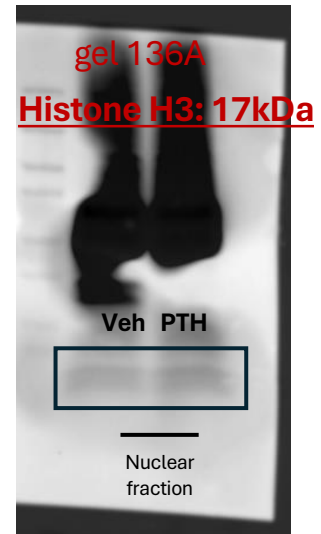

**Figure 2**

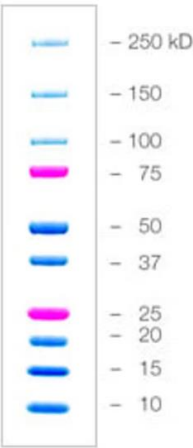

Figure 2E

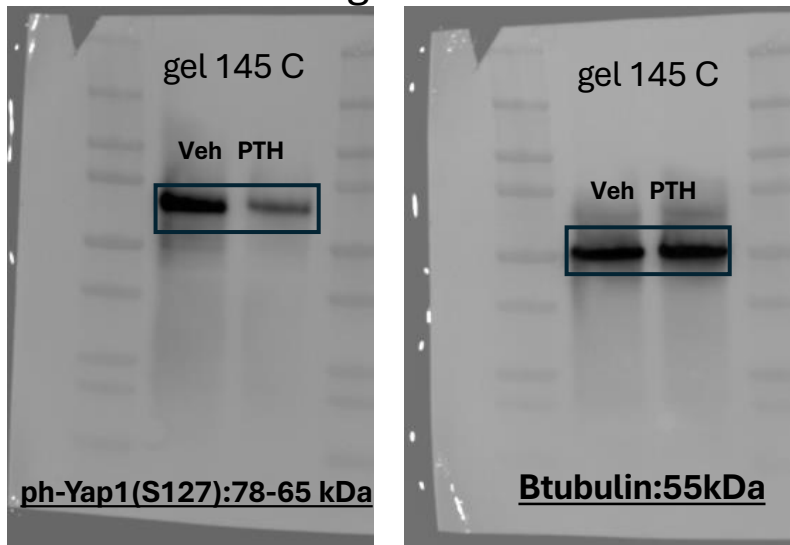

Figure 2E

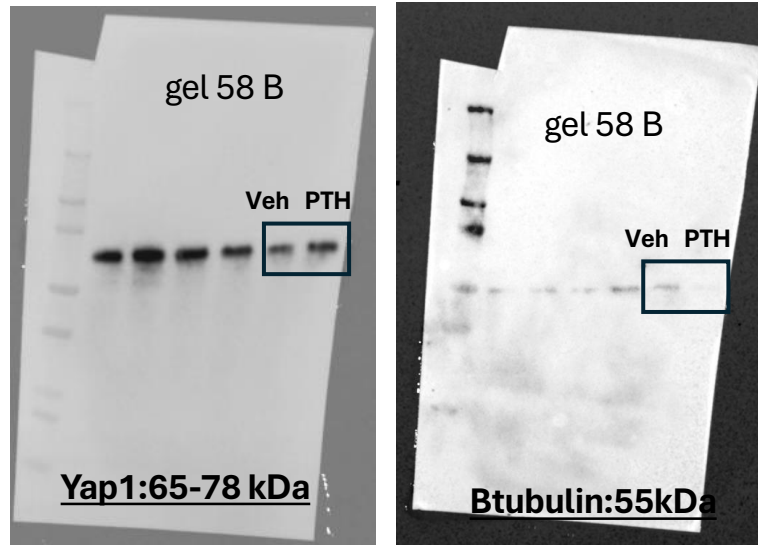

Figure 2E

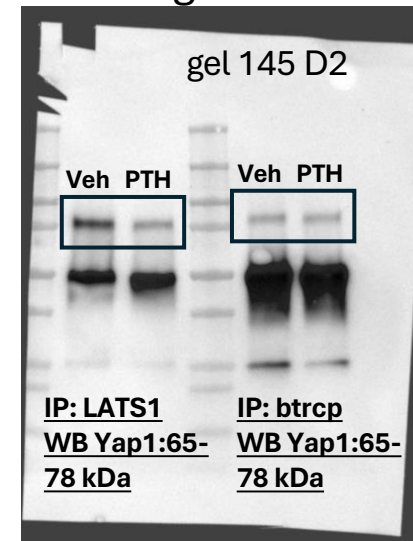

Figure 2E

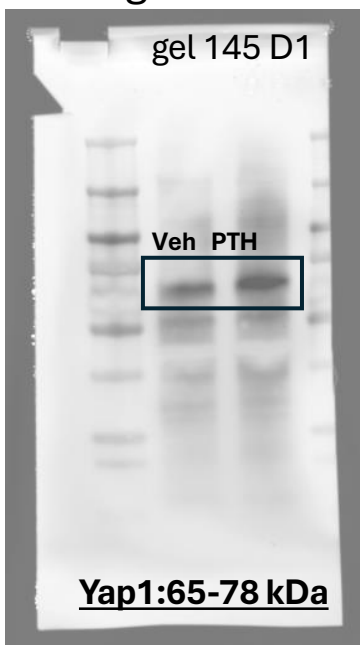

Figure 2E

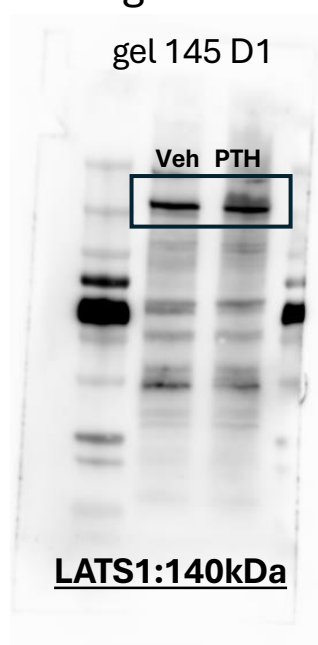

Figure 2E

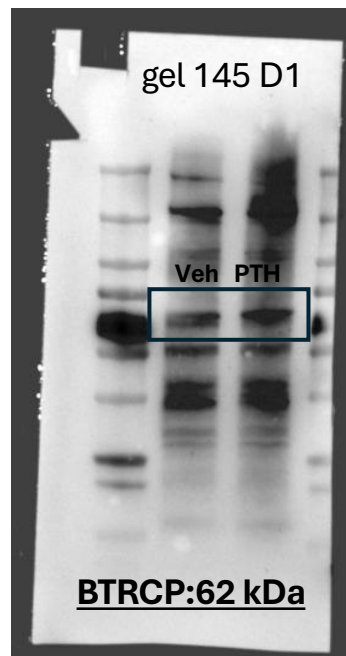

Figure 2E

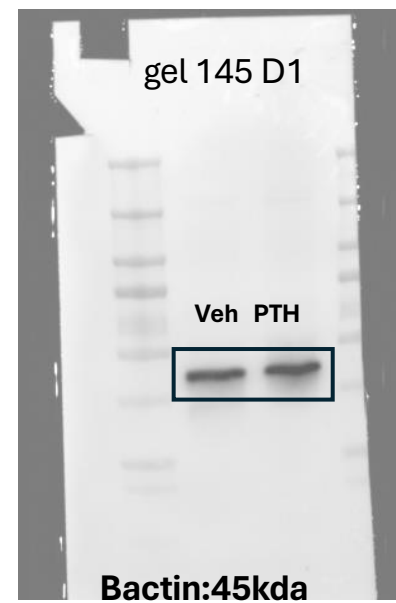

**Figure 2**

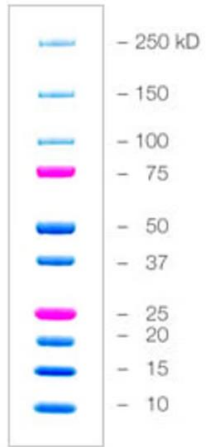

**Figure 2G**

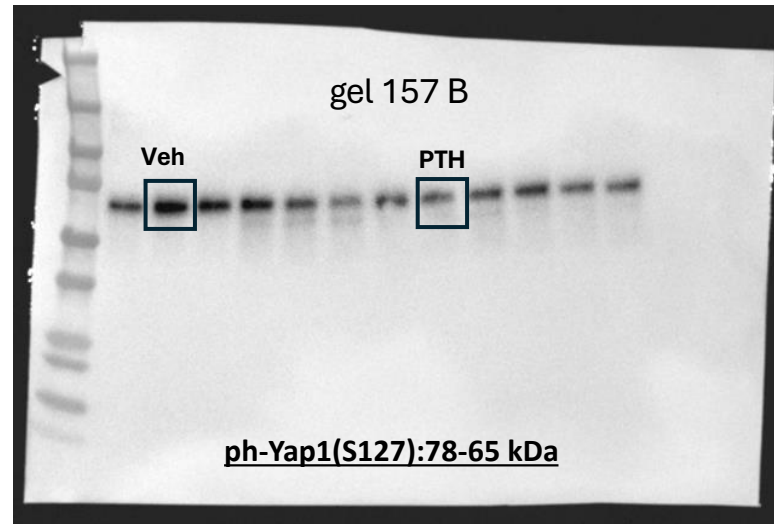

**Figure 2G**

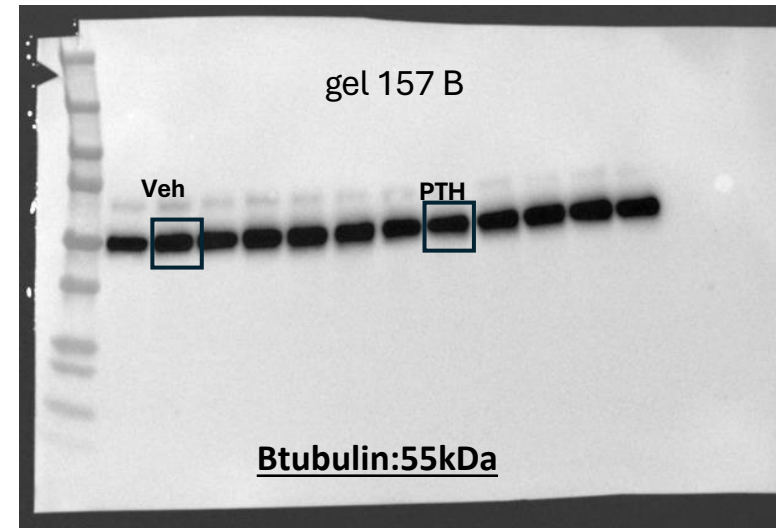

**Figure 2G**

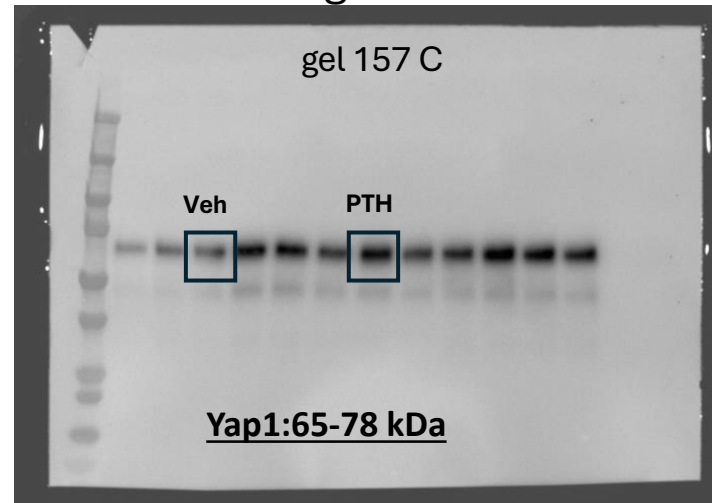

**Figure 2G**

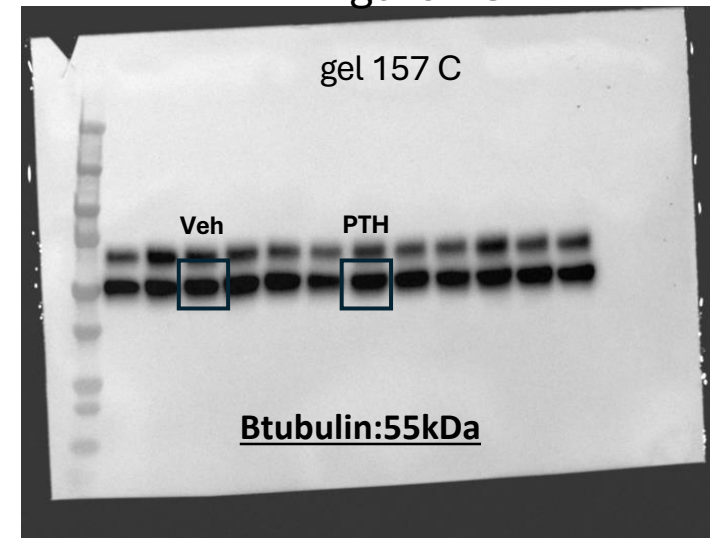

**Figure 3**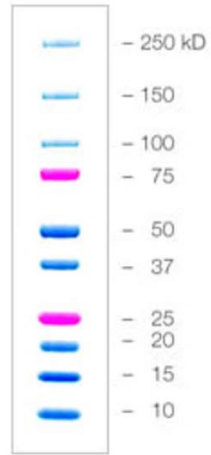**Figure 3A**

Gel 150D

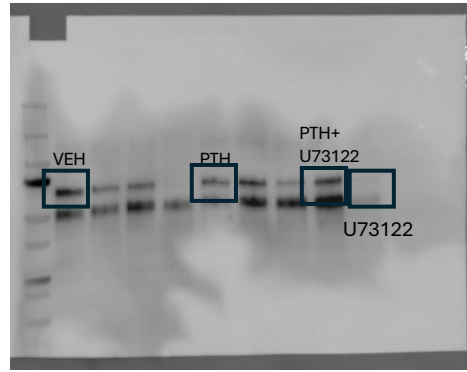**ph-Yap1(S127):78-65 kDa****Figure 3A**

Gel 150D

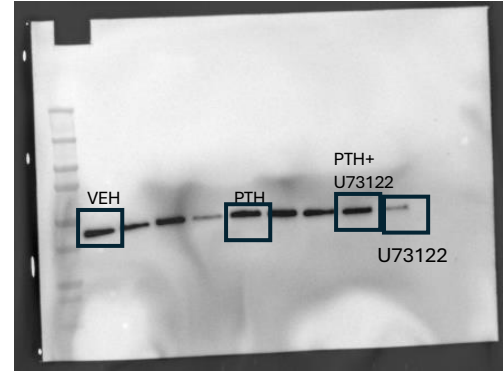**Bactin:45kda****Figure 3A**

Gel 152 C3

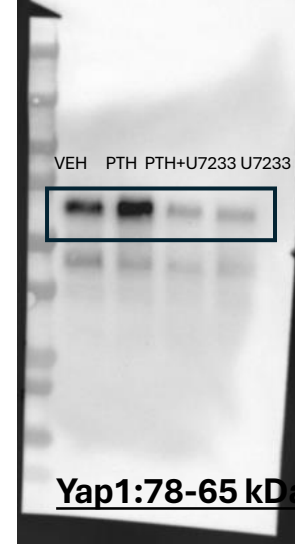**Yap1:78-65 kDa****Figure 3A**

Gel 152 C3

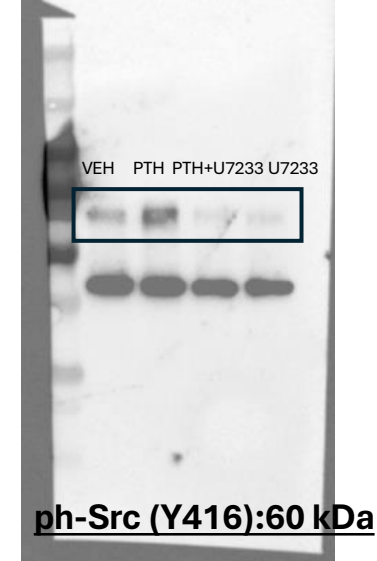**ph-Src (Y416):60 kDa****Figure 3A**

Gel 152 C3

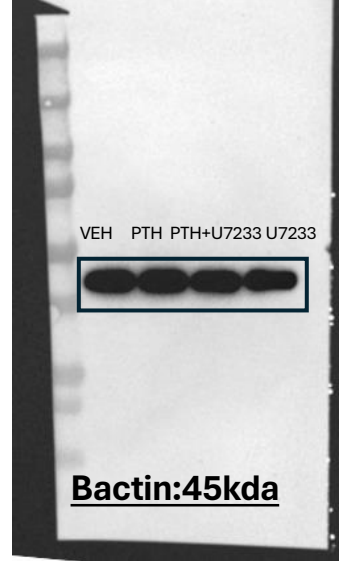**Bactin:45kda****Figure 3B**

Gel 85 A1

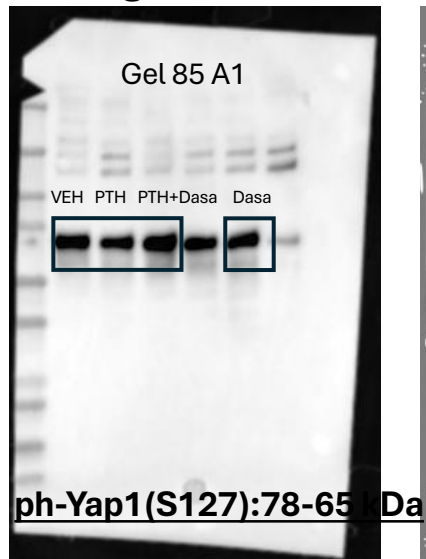**ph-Yap1(S127):78-65 kDa****Figure 3B**

Gel 85 A1

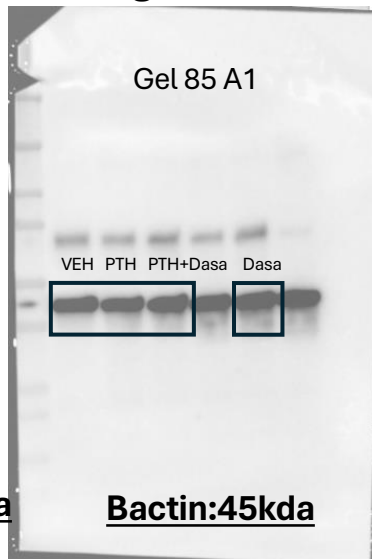**Bactin:45kda****Figure 3B**

Gel 85 B

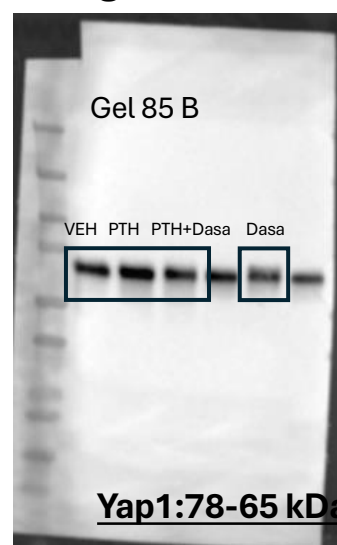**Yap1:78-65 kDa****Figure 3B**

Gel 85 B

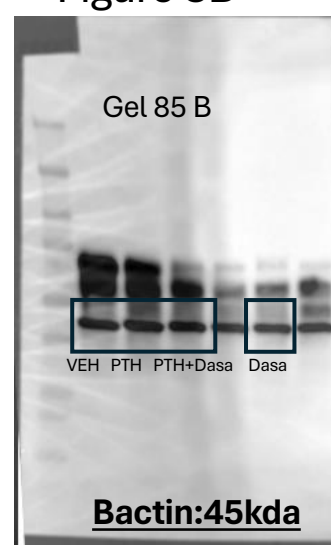**Bactin:45kda****Figure 3B**

Gel 85 A

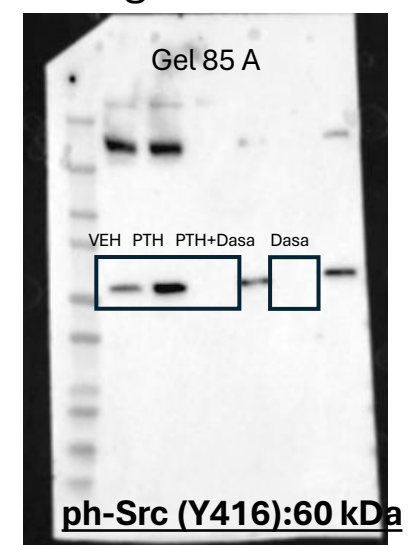**ph-Src (Y416):60 kDa****Figure 3B**

Gel 85 A

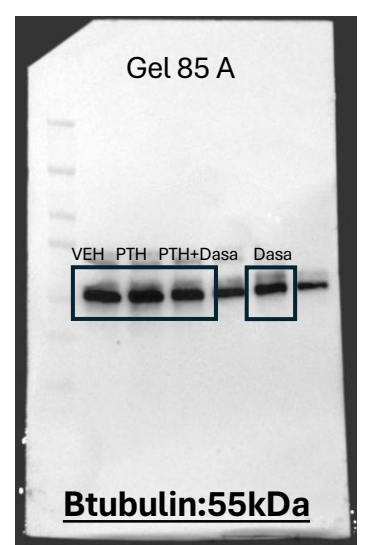**Btubulin:55kDa**

**Figure 3**

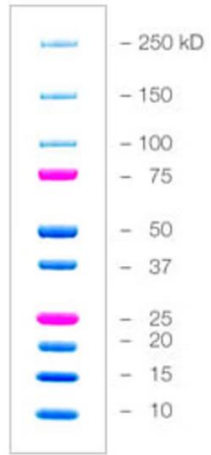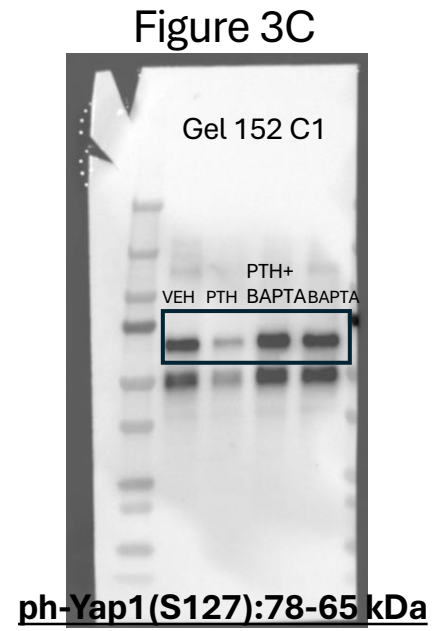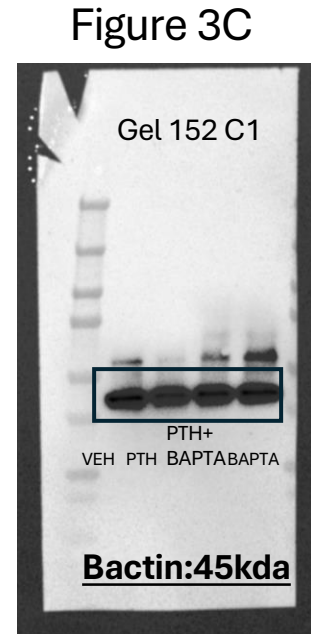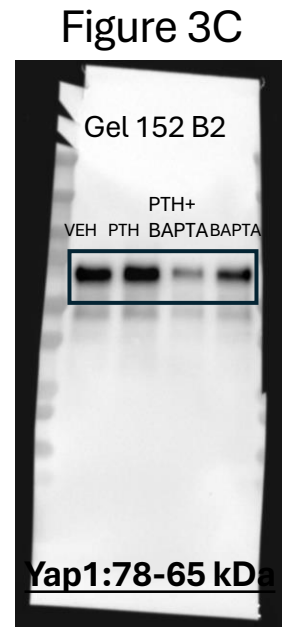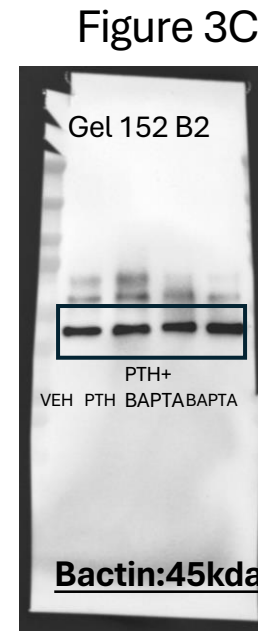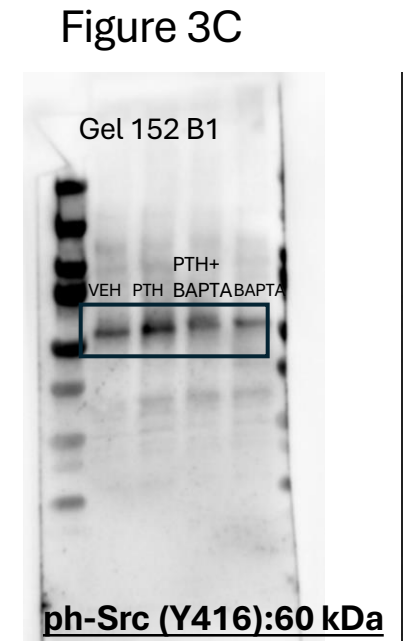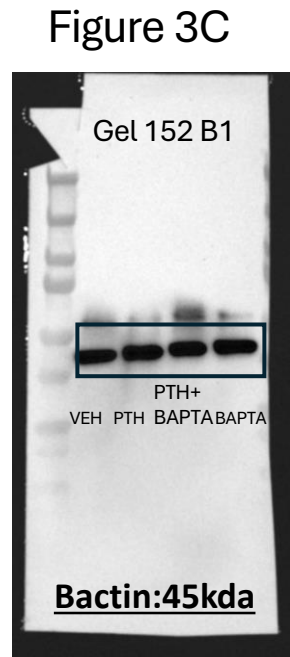

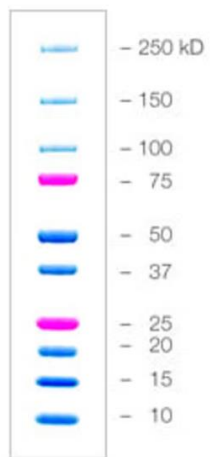

Figure 4A

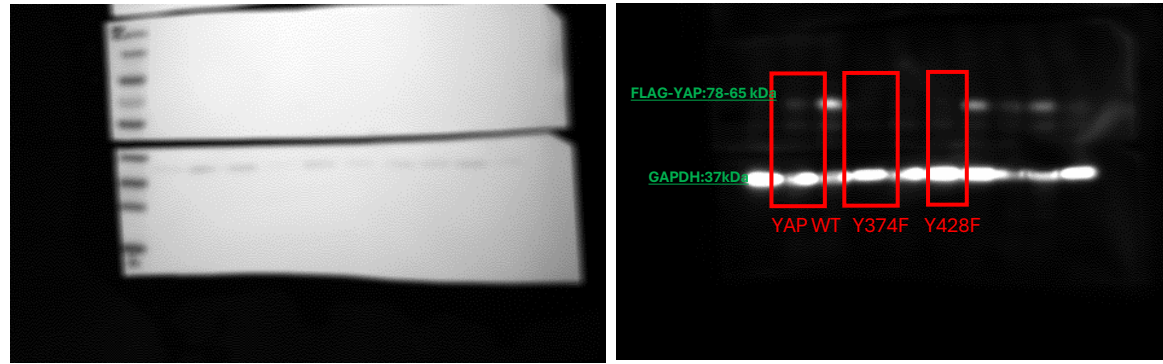

Figure 4A

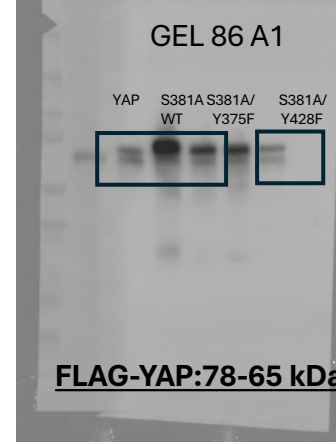

Figure 4A

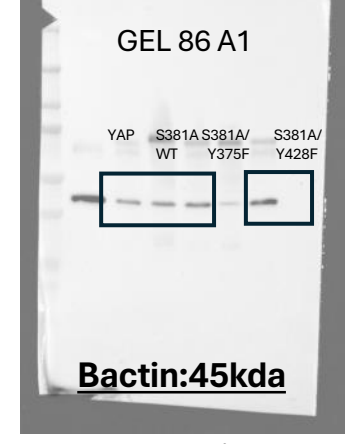

Figure 4B

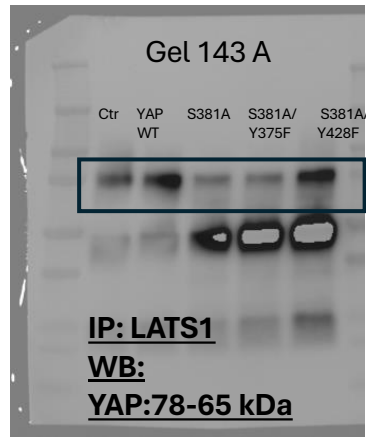

Figure 4B

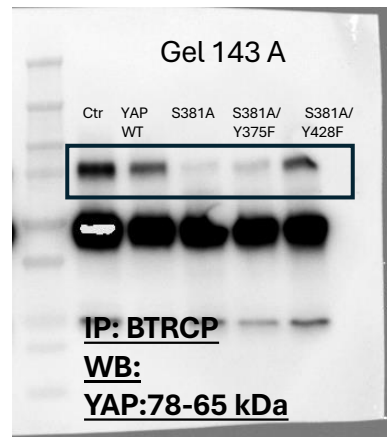

Figure 4B

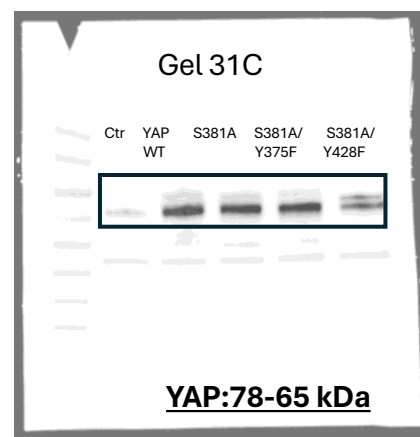

Figure 4B

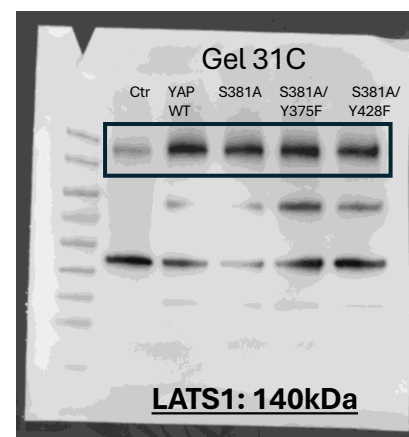

Figure 4B

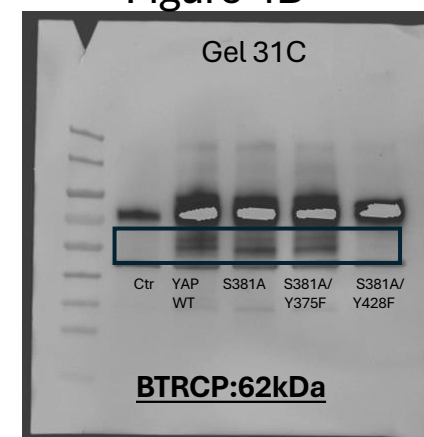

Figure 4B

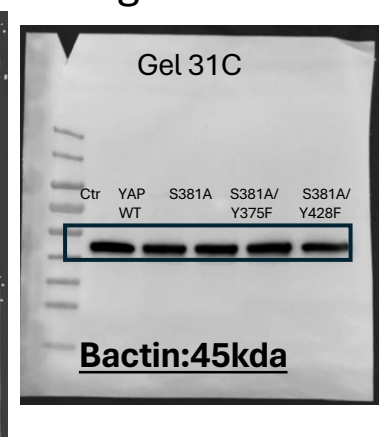

Figure 4B

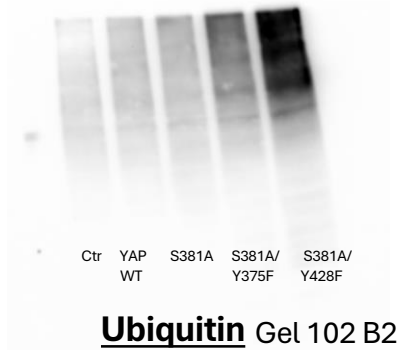

Figure 4B

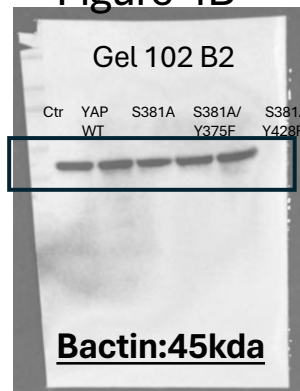

Gel 78A

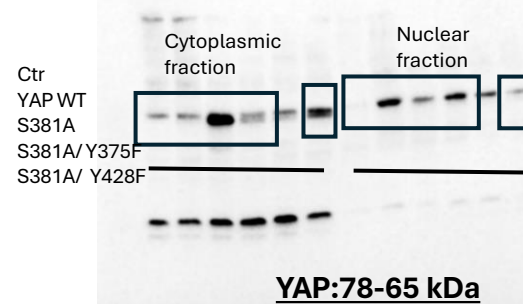

Gel 78A  
Btubulin:55kda

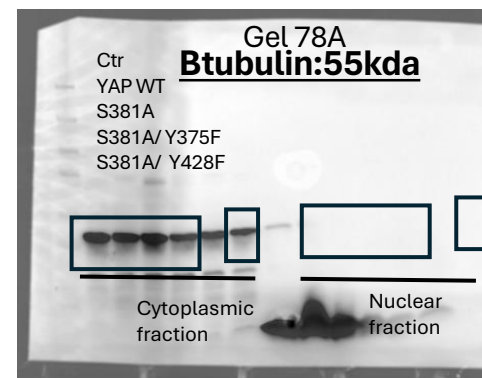

Gel 78A Histone H3: 17 kDa

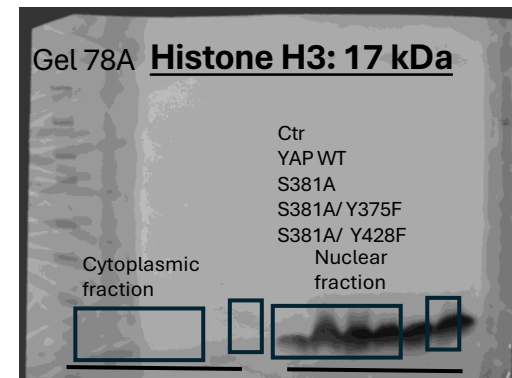

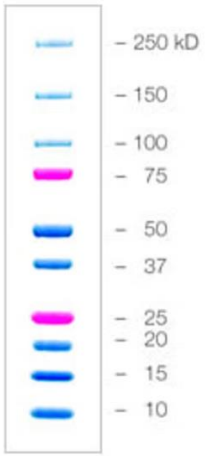

Figure 5A

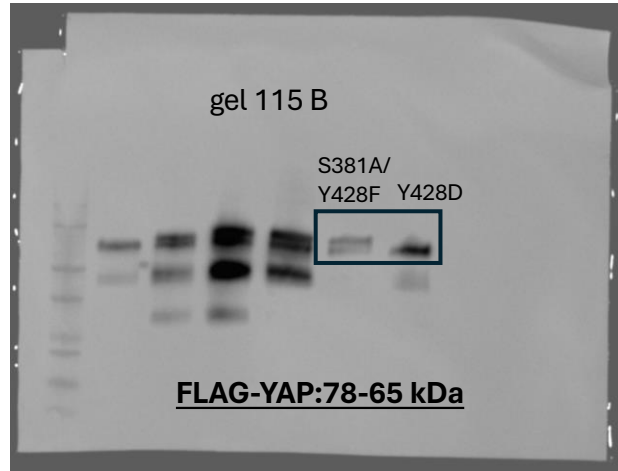

Figure 5A

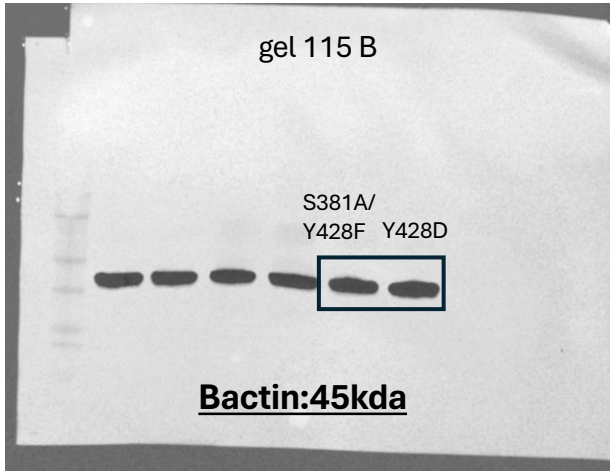

Figure 5A

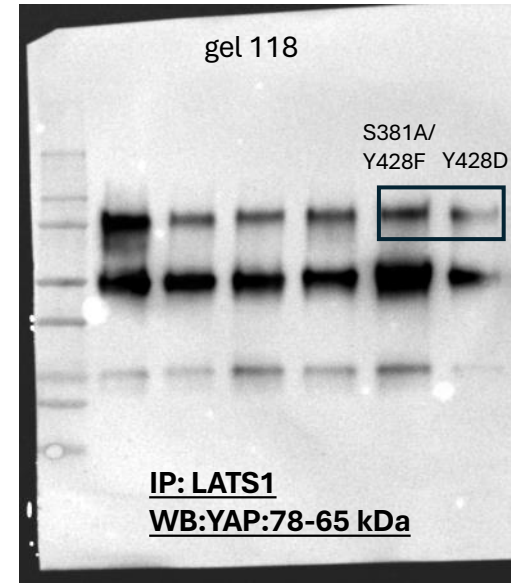

Figure 5A

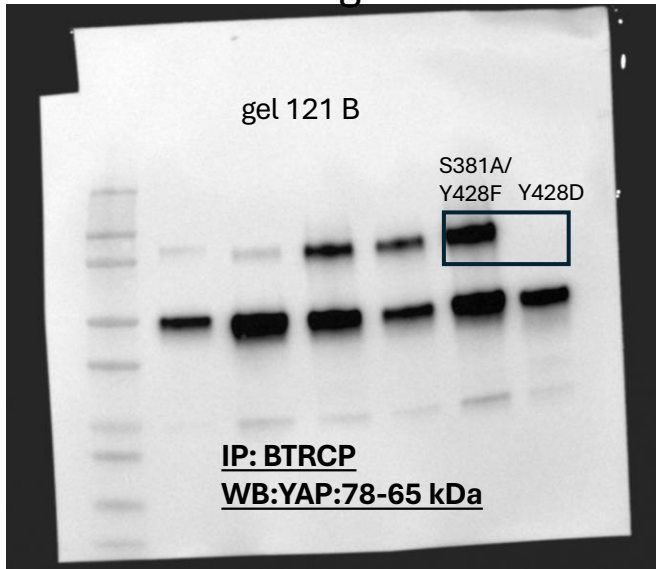

Figure 5A

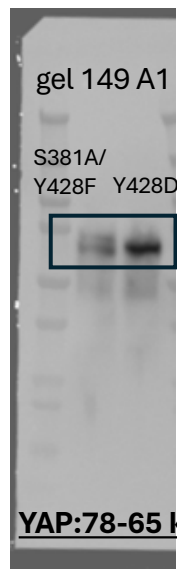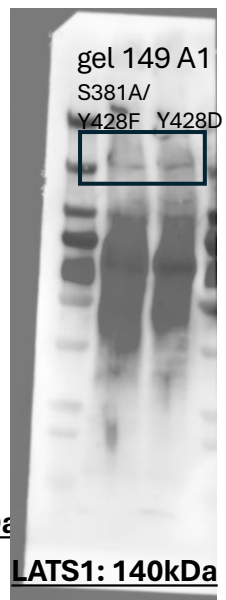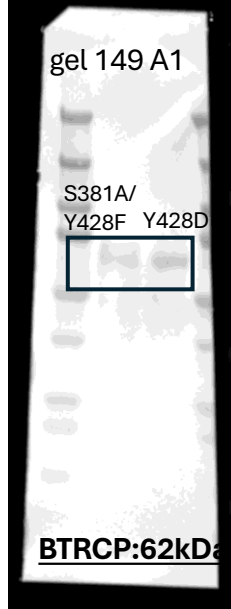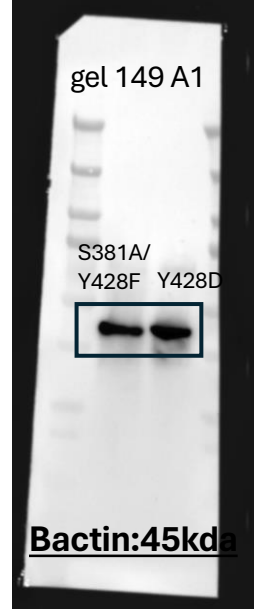

Figure 5A

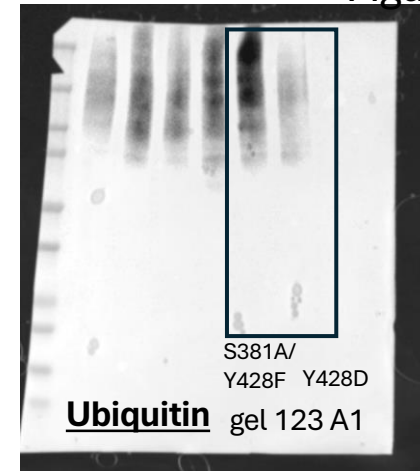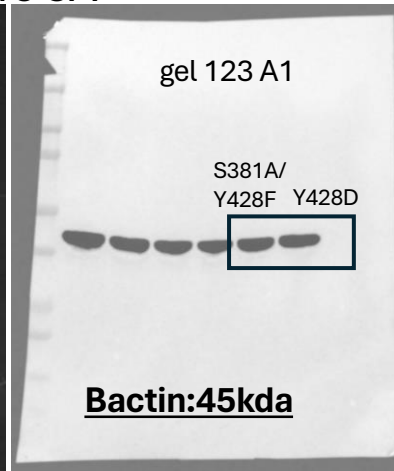

Figure 5B

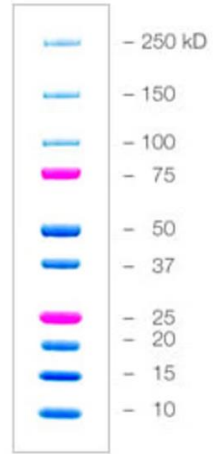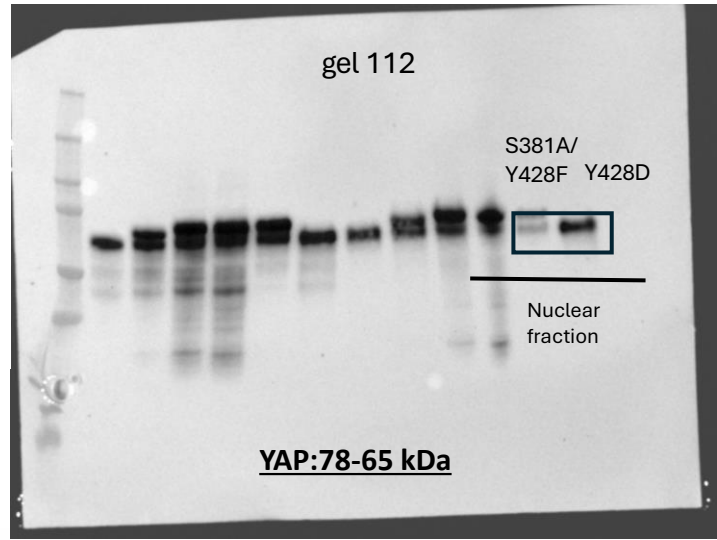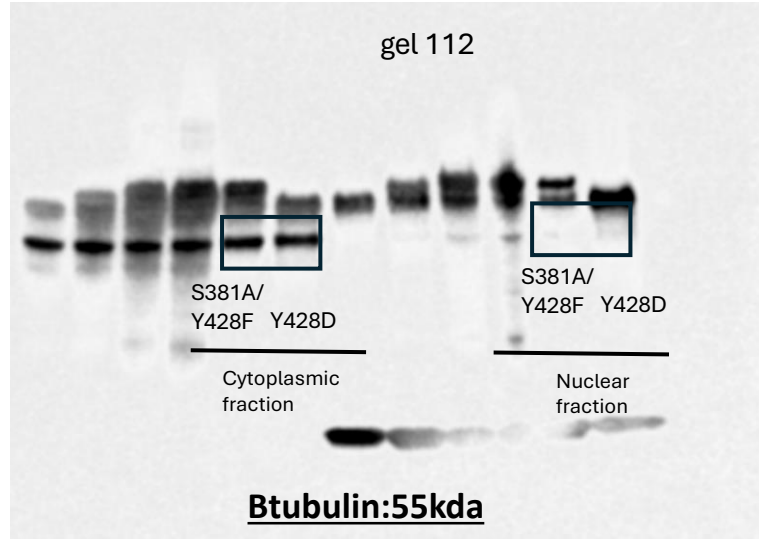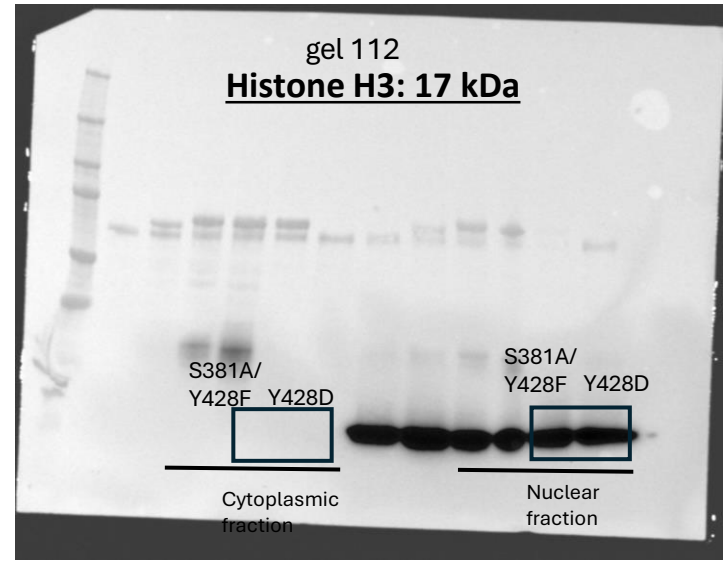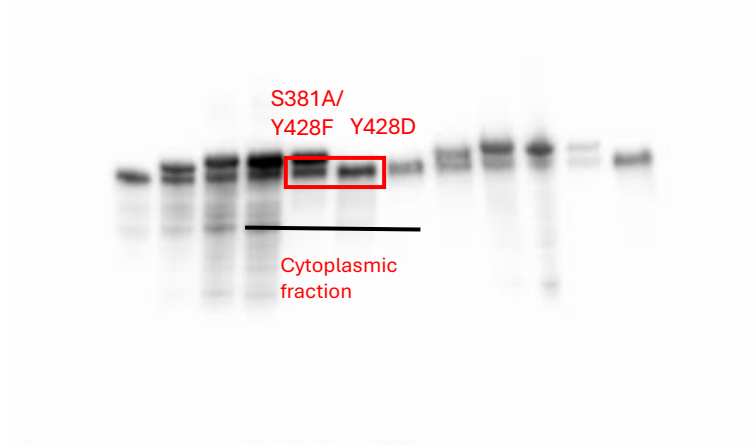

**Figure 6**

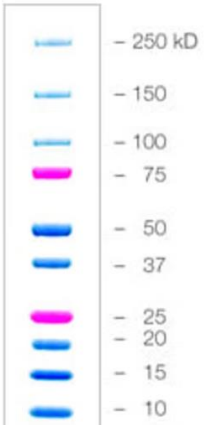

Figure 6A

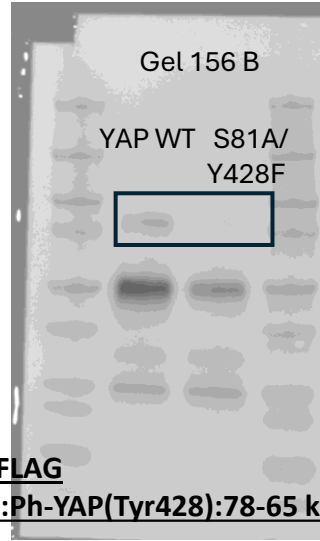

Figure 6A

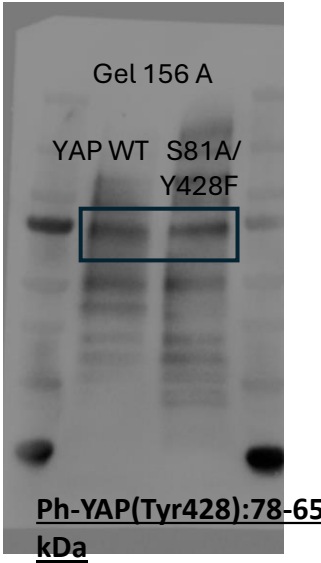

Figure 6A

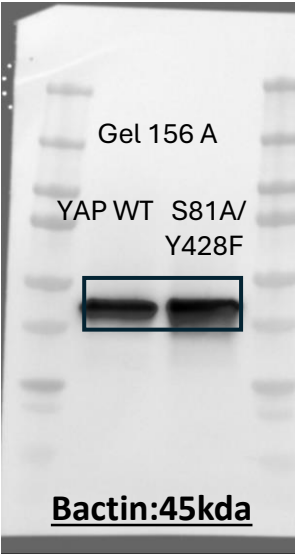

Figure 6A

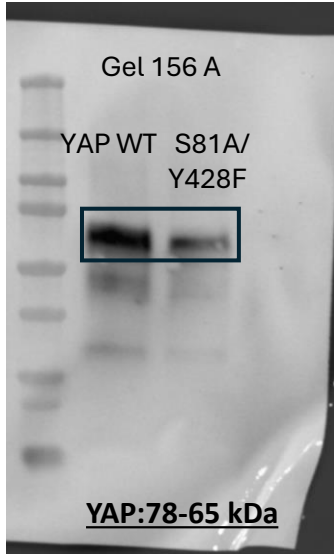

Figure 6A

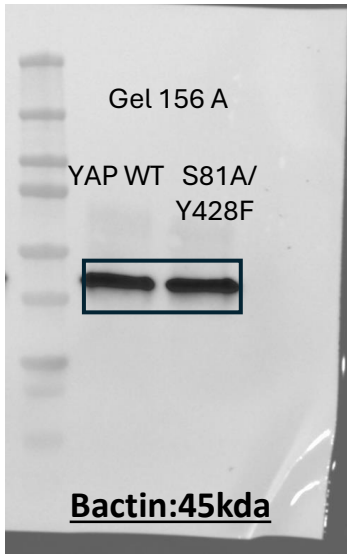

Figure 6B

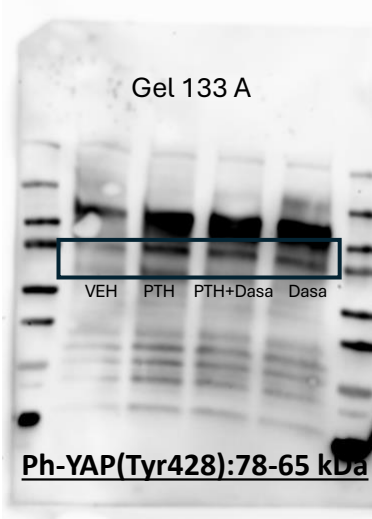

Figure 6B

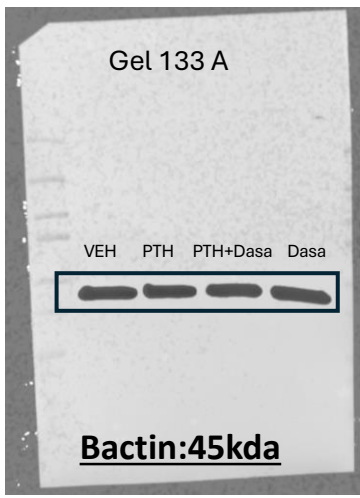

Figure 6B

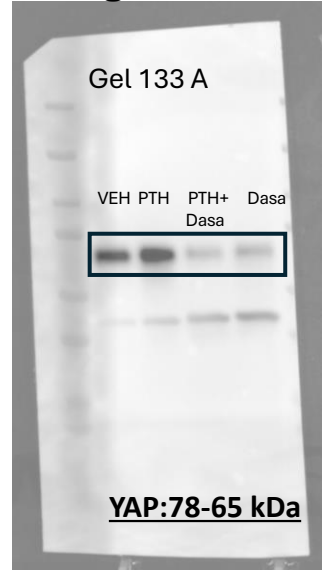

Figure 6B

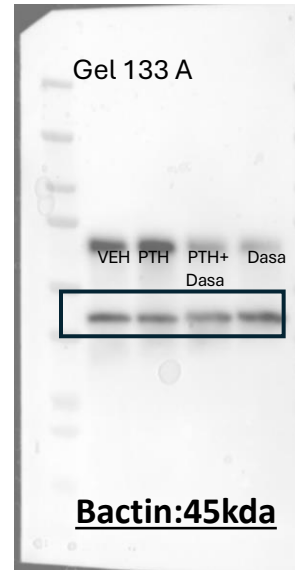

**Figure 6**

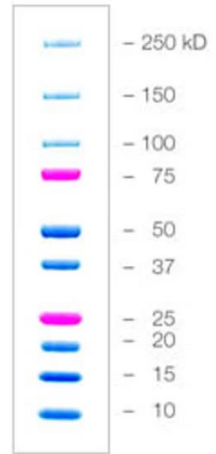

**Figure 6C**

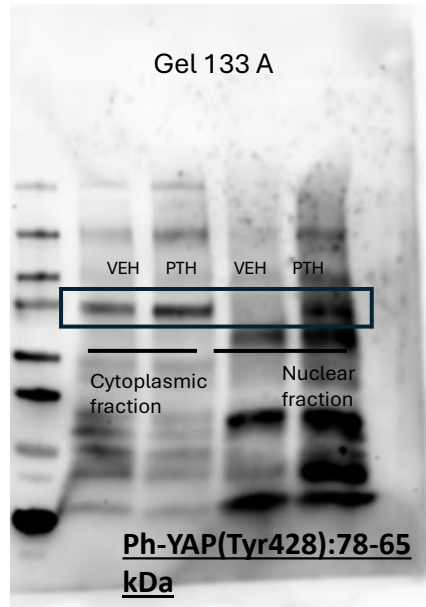

**Figure 6C**

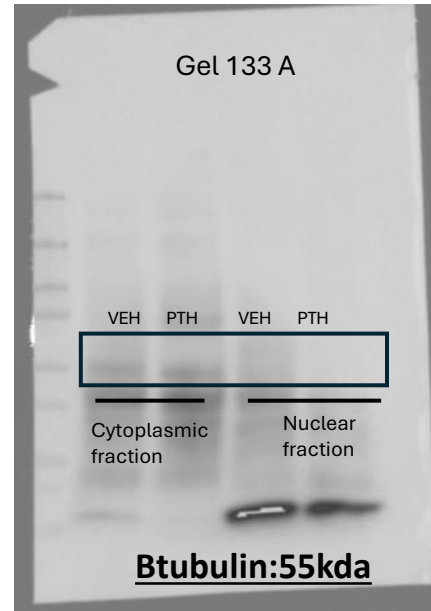

**Figure 6C**

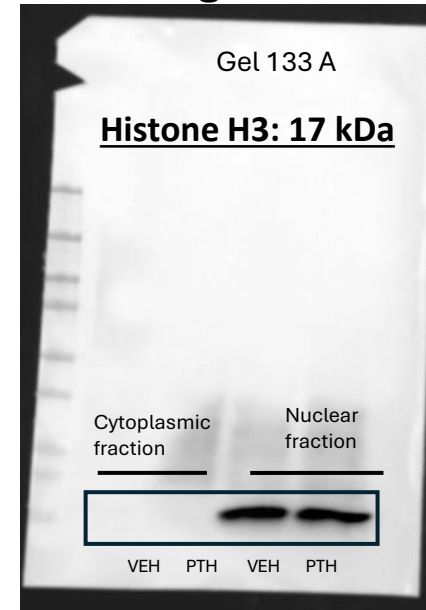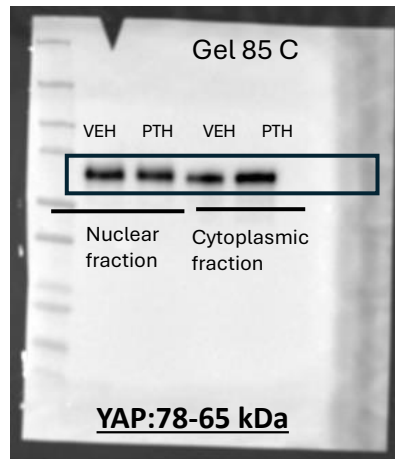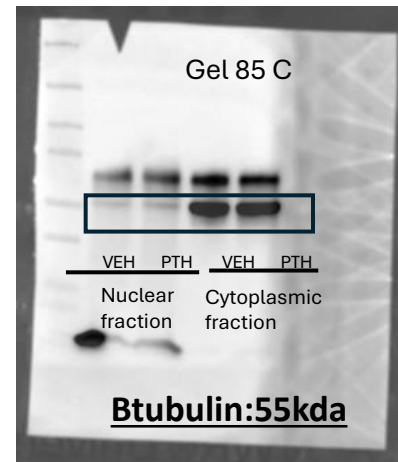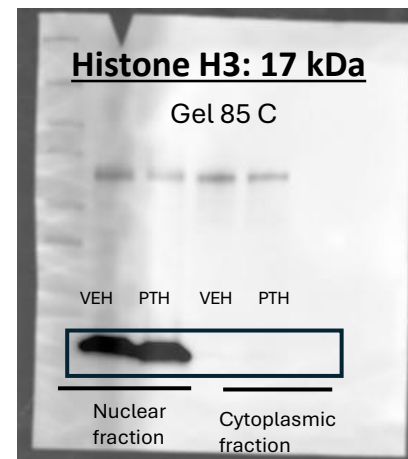

**Figure 7**

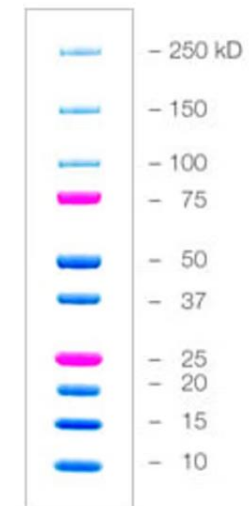

**Figure 7A**

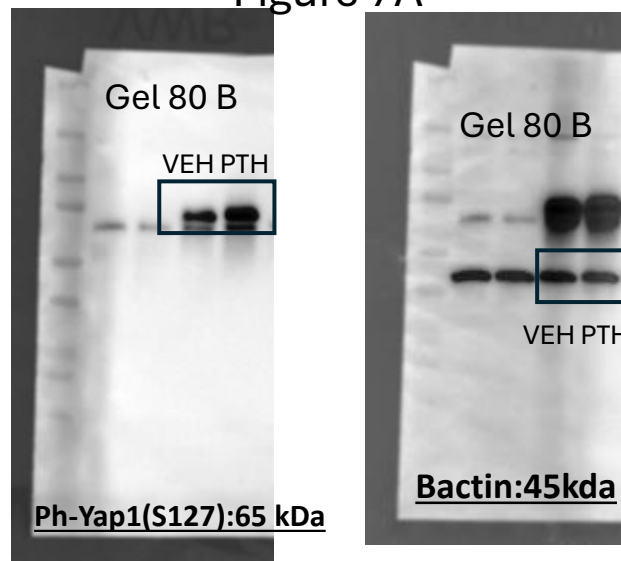

**Figure 7A**

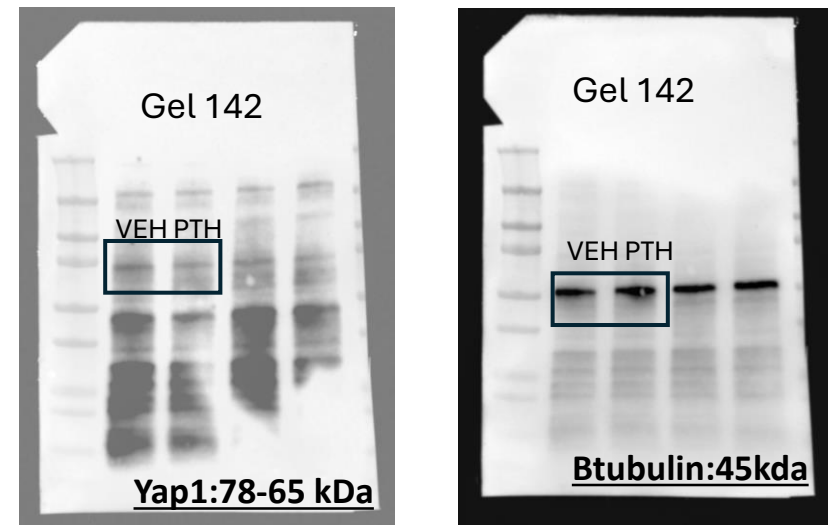

**Figure 7A**

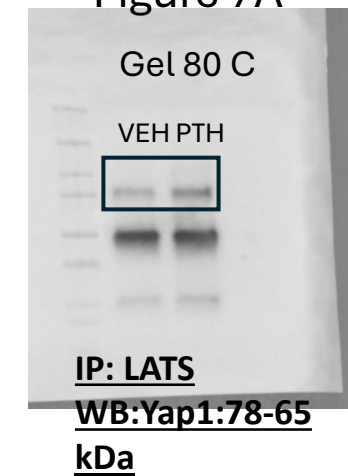

**Figure 7A**

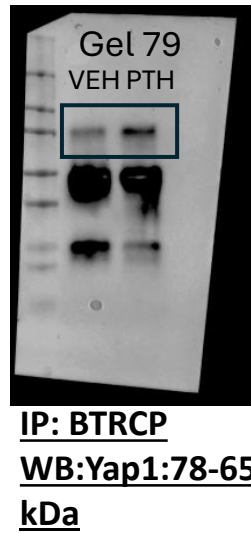

**Figure 7A**

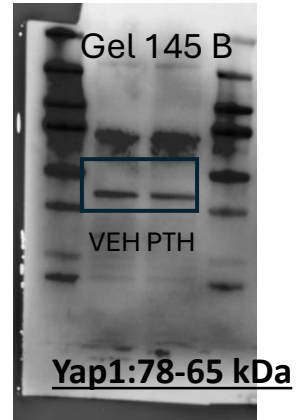

**Figure 7A**

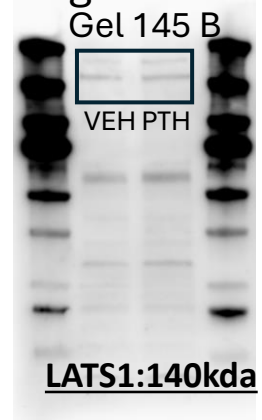

**Figure 7A**

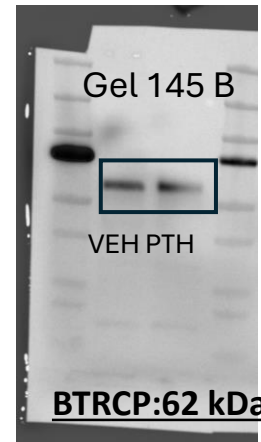

**Figure 7A**

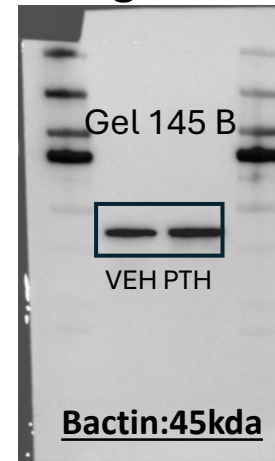

**Figure 7A**

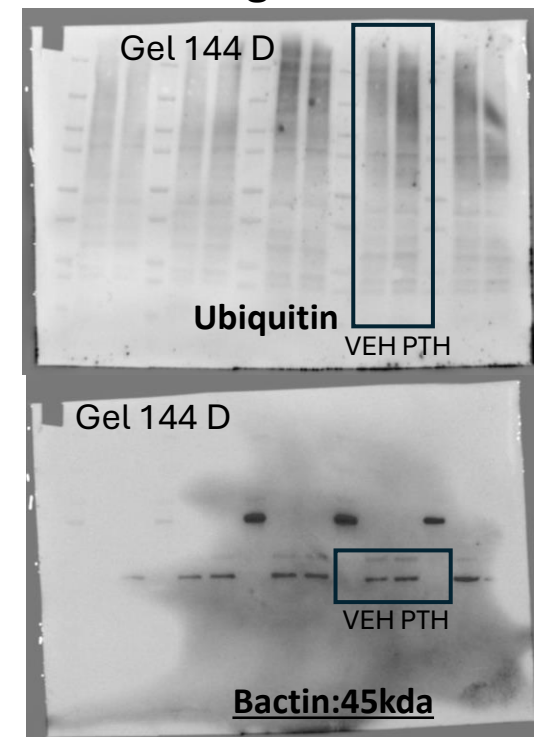

**Figure 7B**

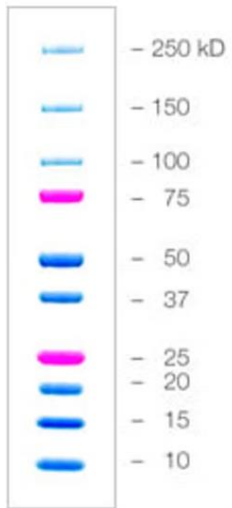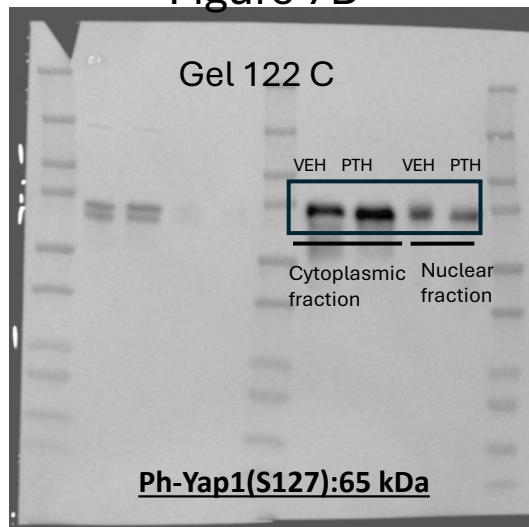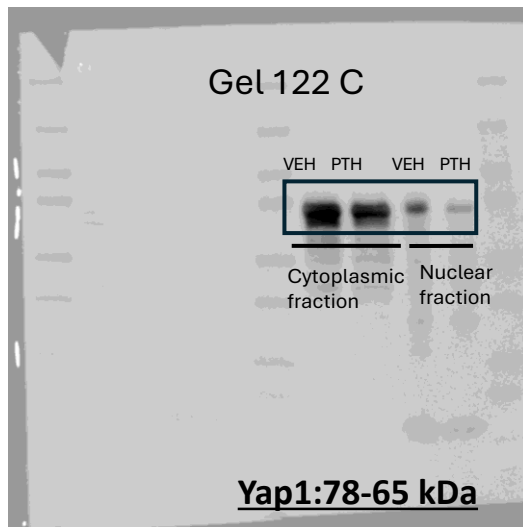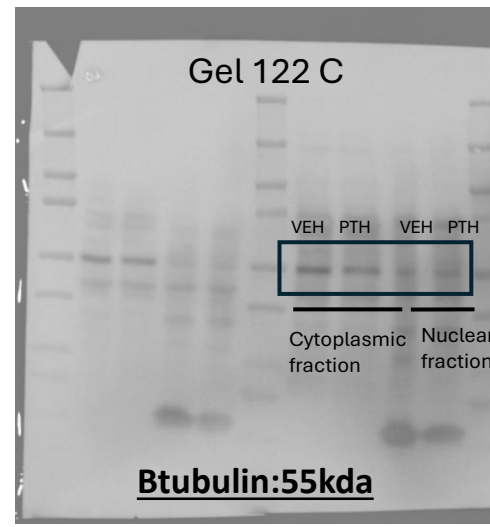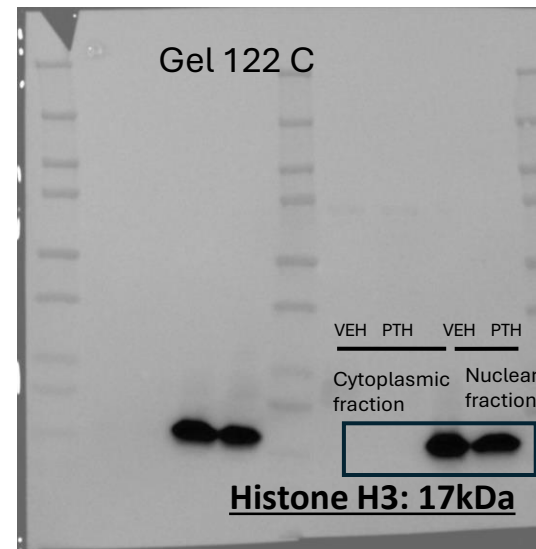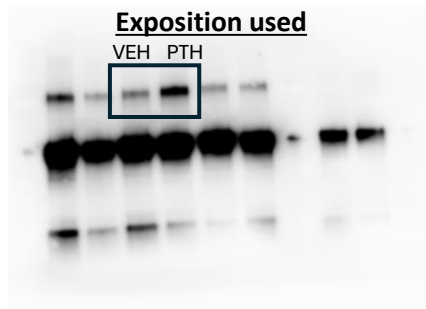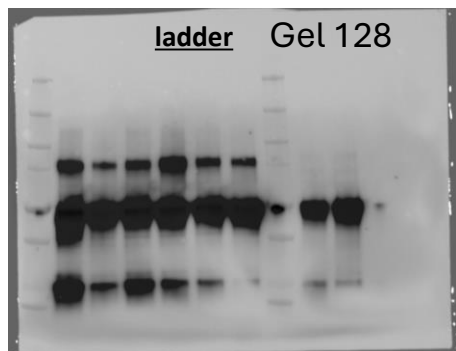

**IP: LATS**  
**WB:Yap1:78-65 kDa**

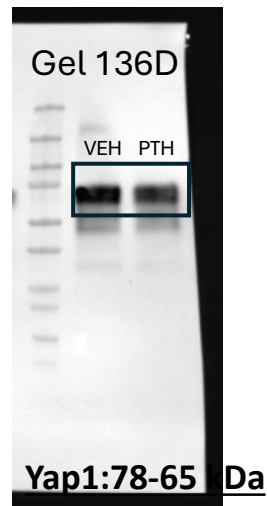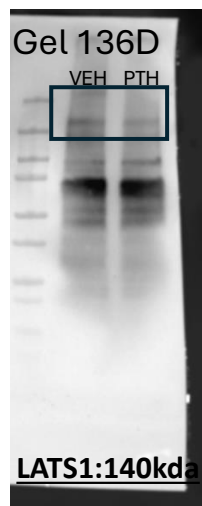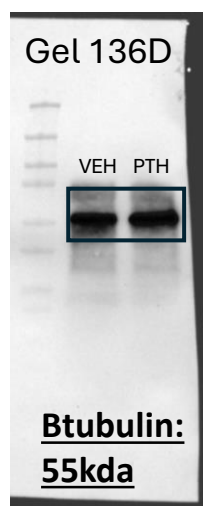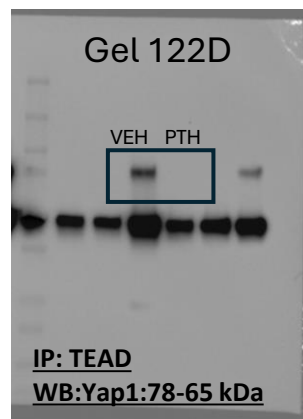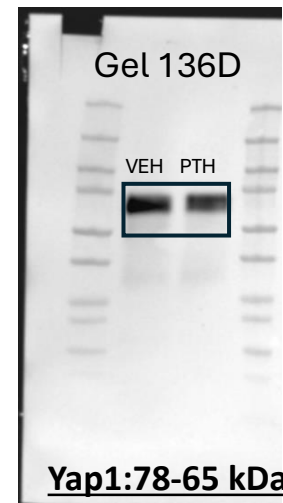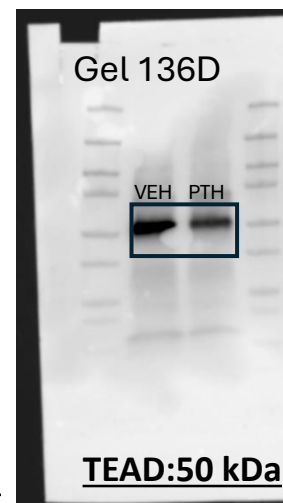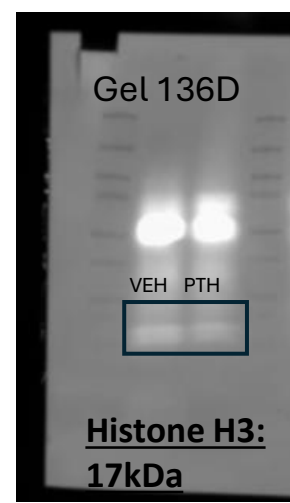

# Supplementary Figure 1

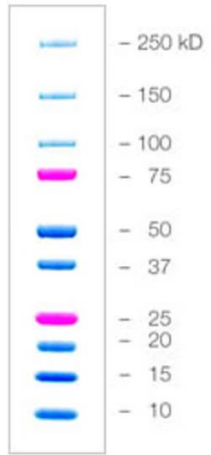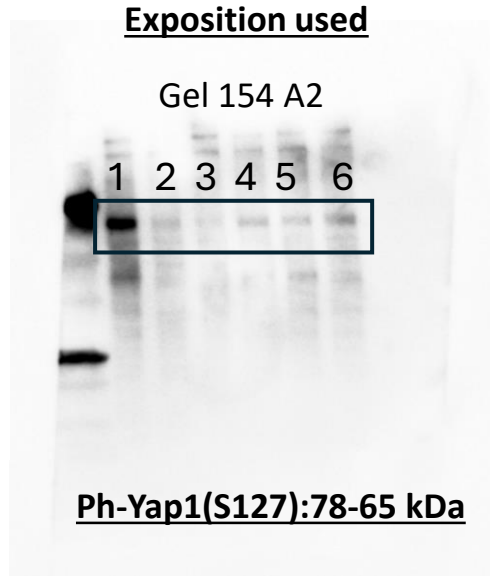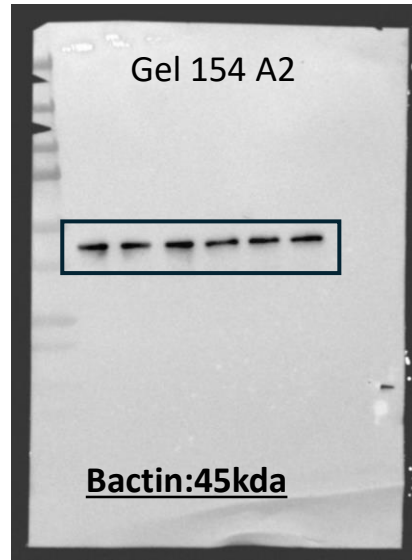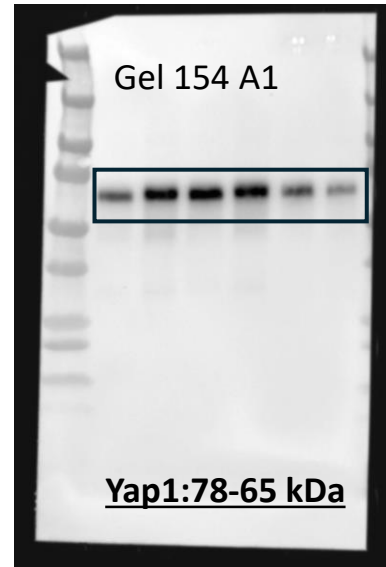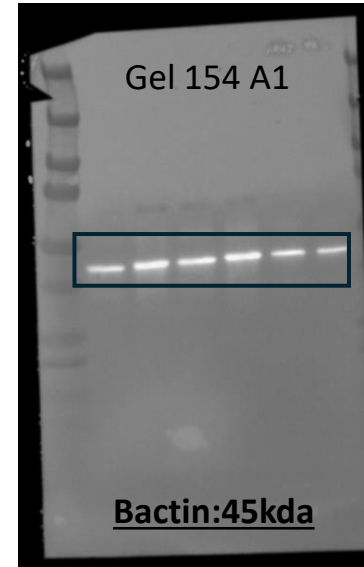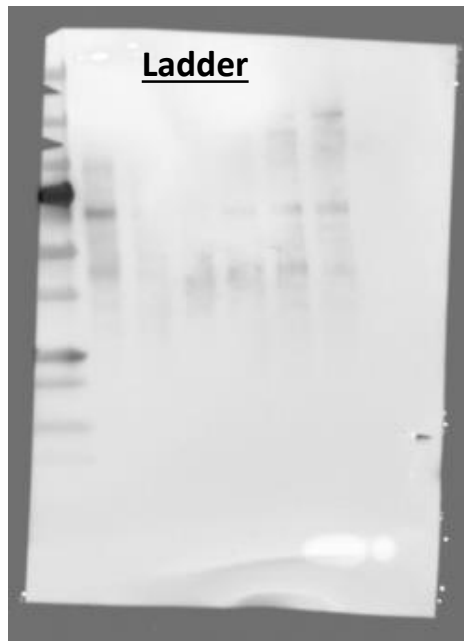

**Loading:**  
Lane 1: CTR  
Lane 2: PTH  
Lane 3: PTH+H89  
Lane 4: PTH+G0  
Lane 5: H89  
Lane 6: G0

# Supplementary Figure 2

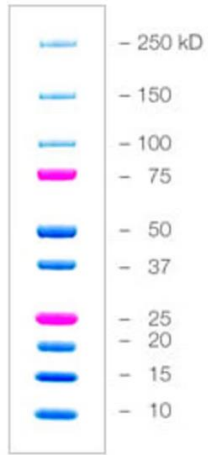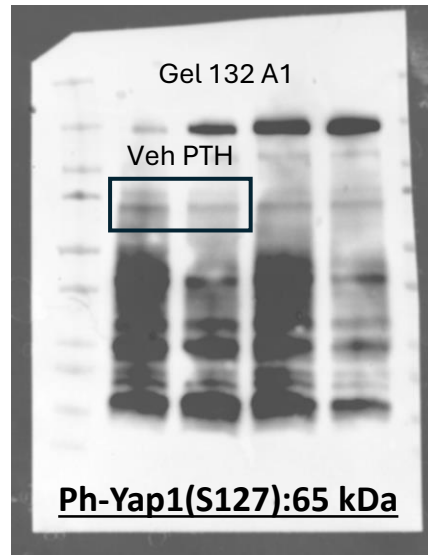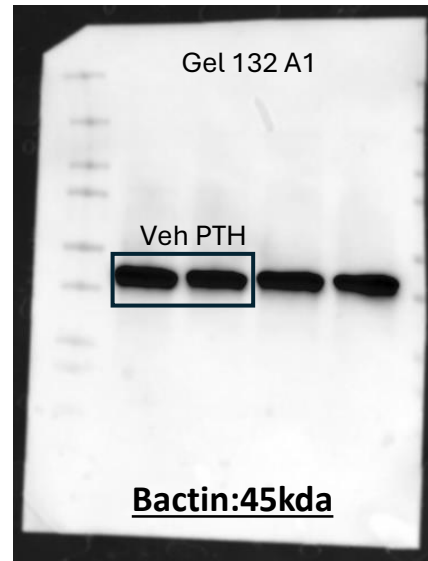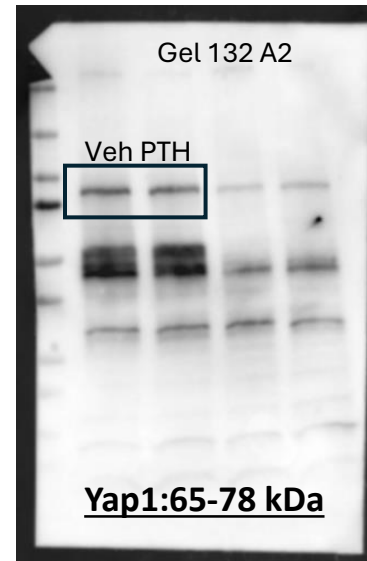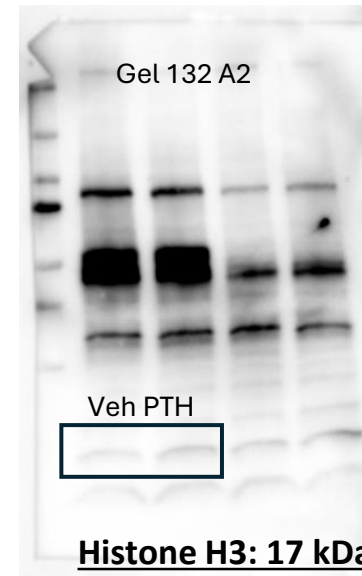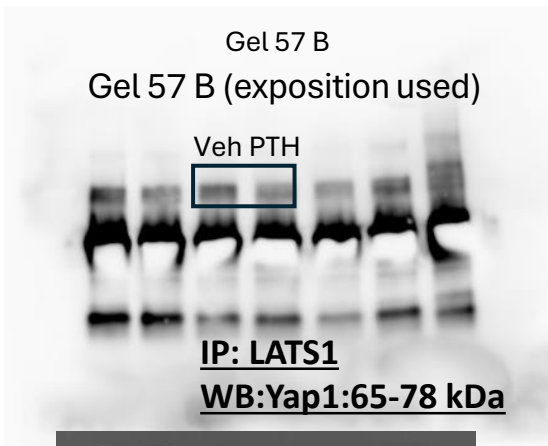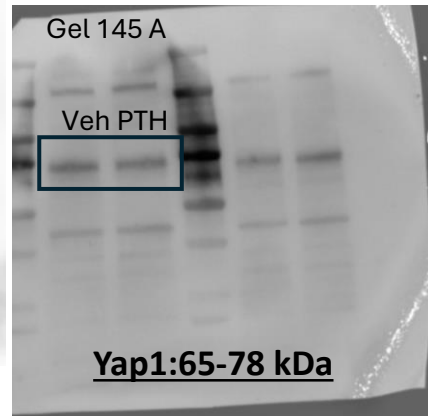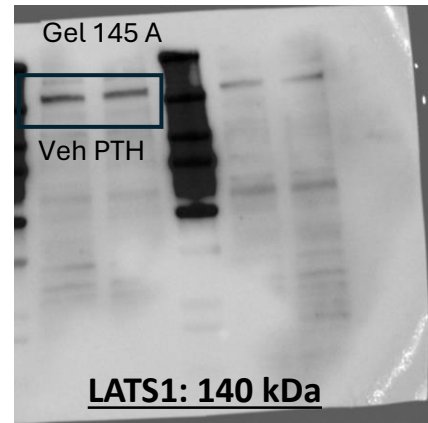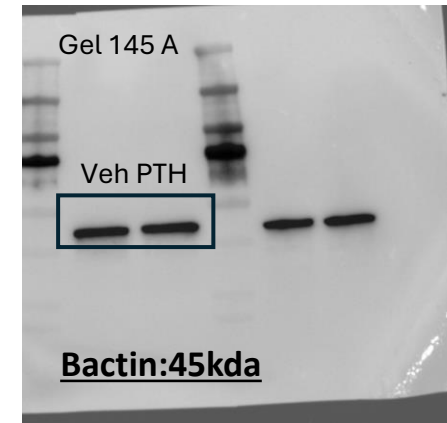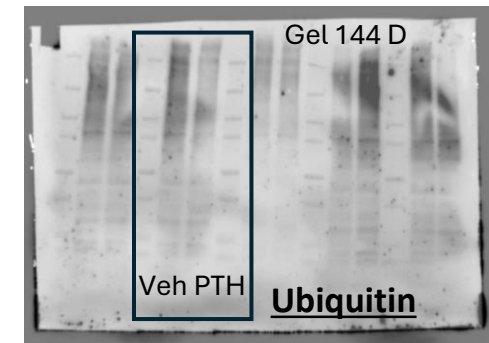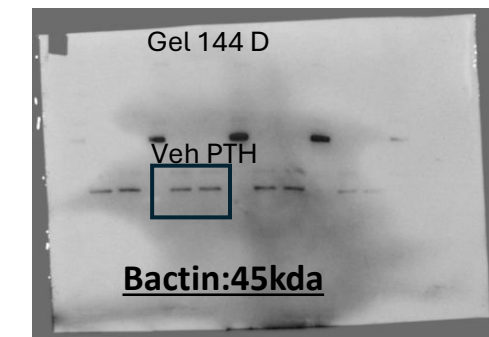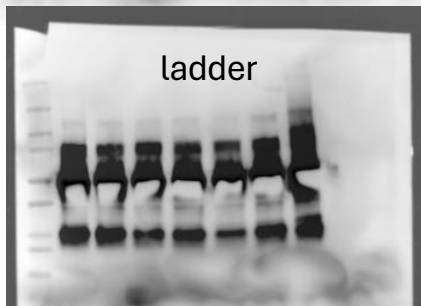

# Supplementary Figure 3

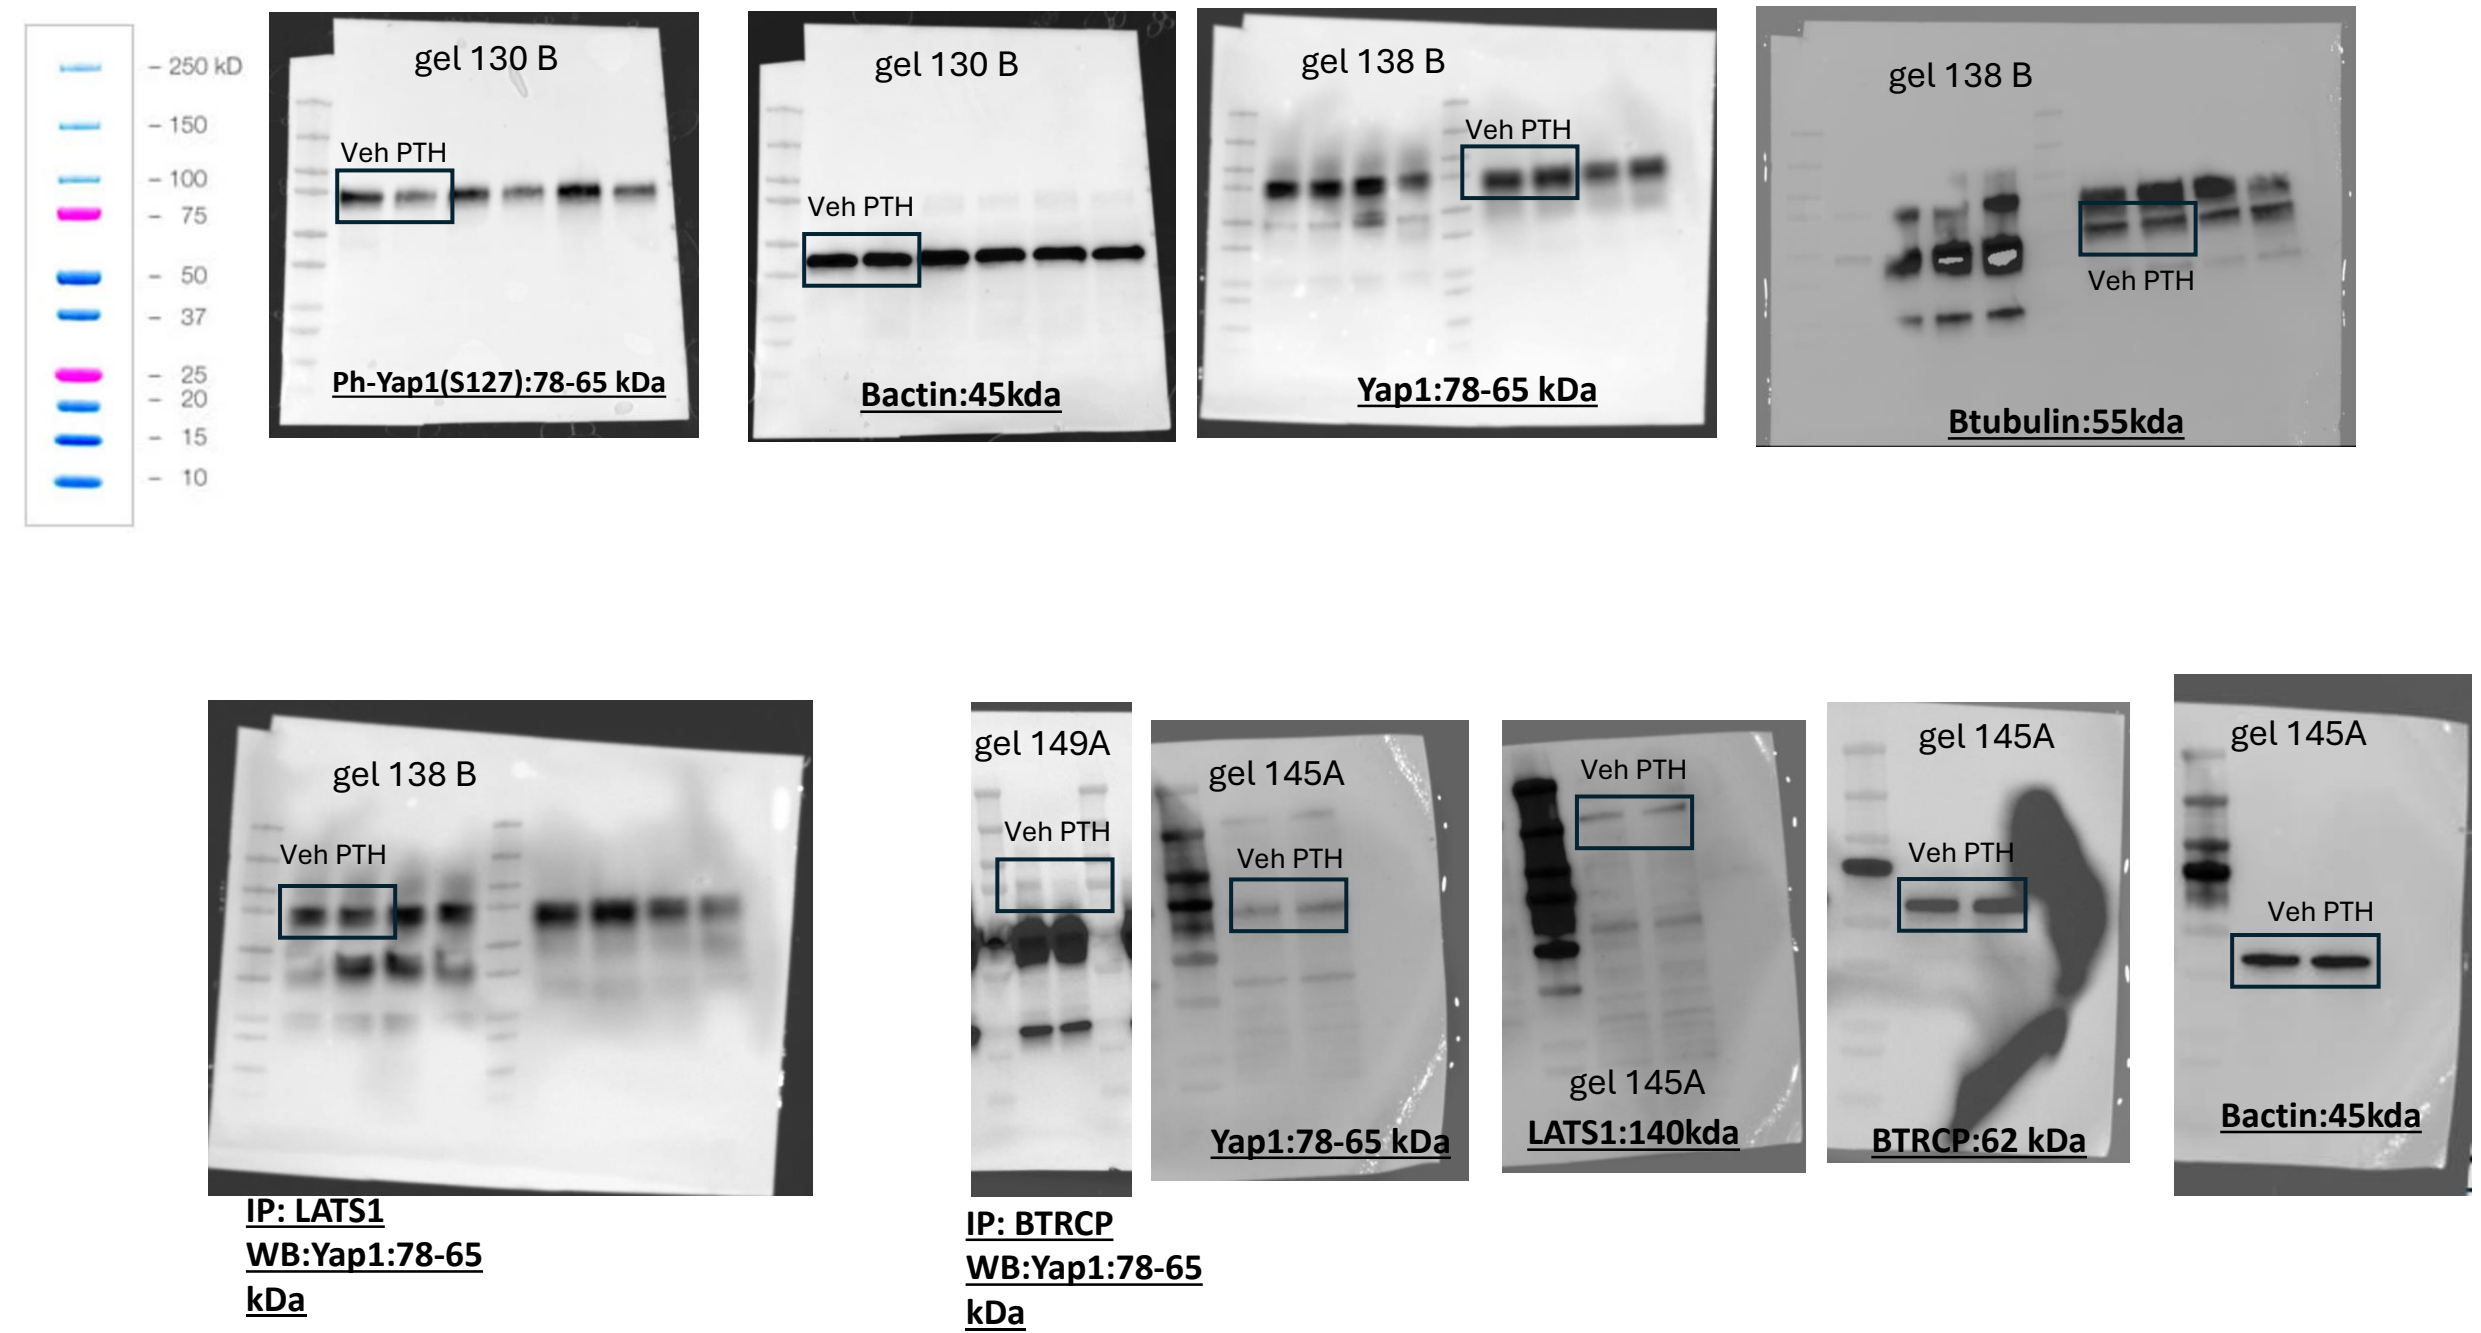

# Supplementary Figure 3

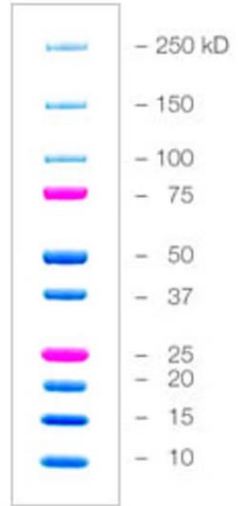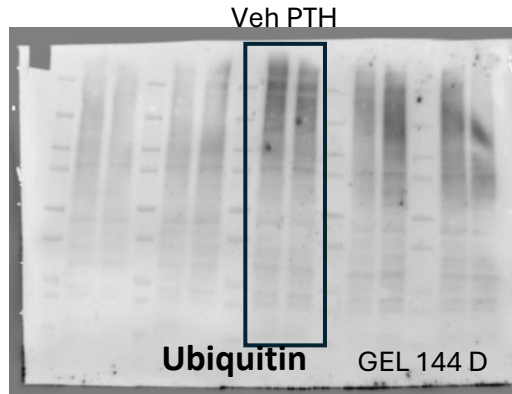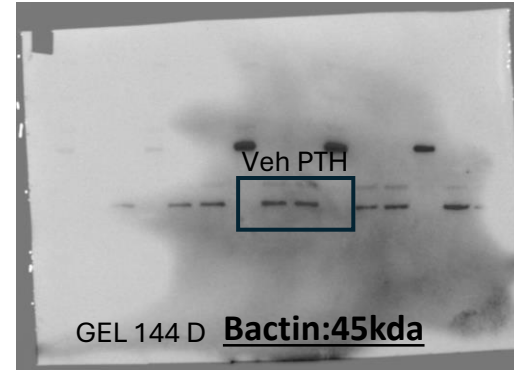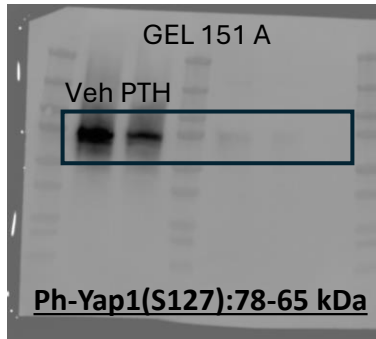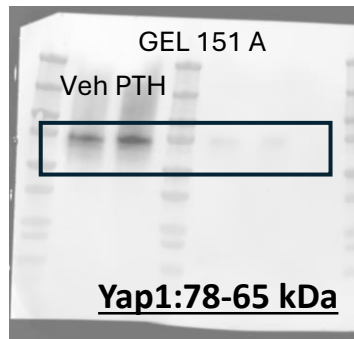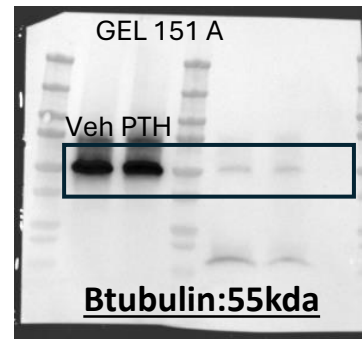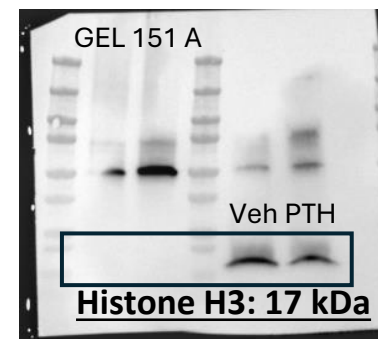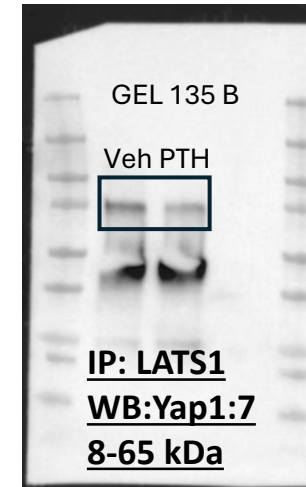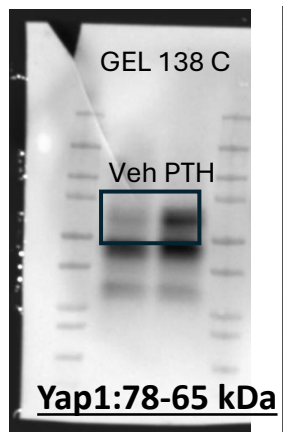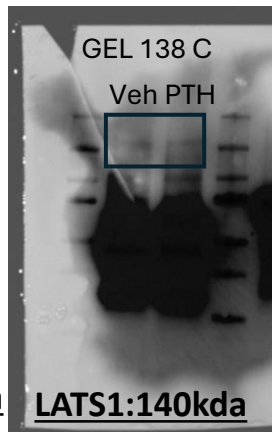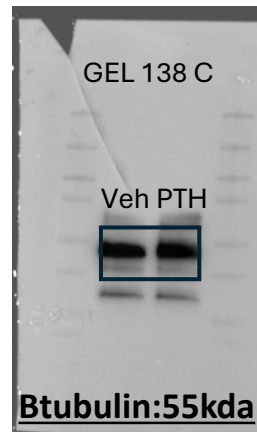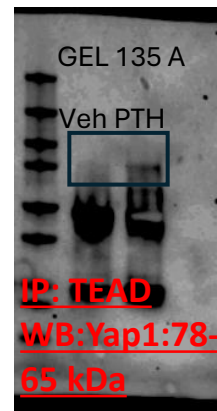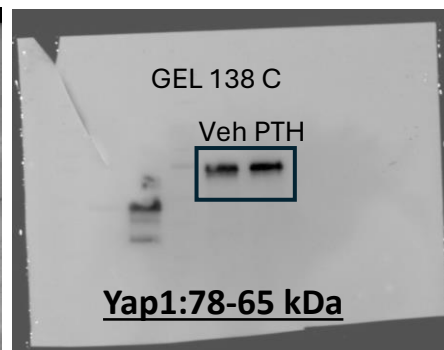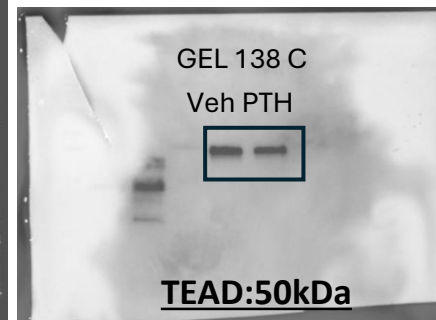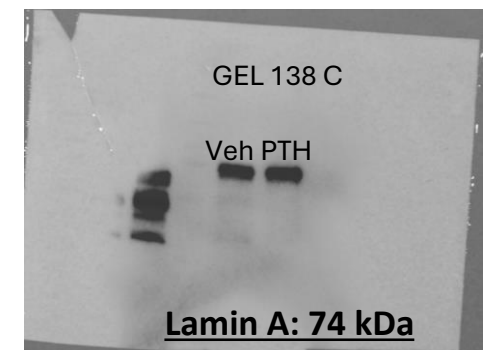

Supplement: sd2 [file 2]
